# Supplementary material for: Heat-Killed Bifidobacterium breve B-3 Enhances Muscle Functions: Possible Involvement of Increases in Muscle Mass and Mitochondrial Biogenesis
Source: PubMed Central journal article supplement (PMC7019314; doi:10.3390/nu12010219), 2020-01-15
Supplement: nutrients-12-00219-s001.pdf [file nutrients-12-00219-s001.pdf]

**Supplemental Table 1. List of primer sets.**

| Target gene    | Sequence (5' to 3') of forward primer | Sequence (5' to 3') of reverse primer | Reference                                                  |
|----------------|---------------------------------------|---------------------------------------|------------------------------------------------------------|
| GAPDH          | ACATTGTTGCCATCAACGAC                  | CTTGCCGTGGGTAGCGTCAT                  | Wang R., et al., Cell Metab. (2013) 17, 5, 685-694.        |
| PGC-1 $\alpha$ | AAAGGGCCAAGCAGAGAGA                   | GTAAATCACA CGGCGCTCTT                 |                                                            |
| COX1           | TGGAGCCCCTGATATAGCATTC                | CCAGCTTCTACTATGGAGGATGC               | Kogot-Levin A., et al., PLoS One. (2016) 11, 10, e0165417. |
| COX2           | GCACAATAGACGCCCAAGAAG                 | AATTCGTAGGGAGGGAAGGG                  |                                                            |
| COX4           | TGAACAAGGGCACCAATGA                   | GCCATACACGTAGCTCTTCTC                 |                                                            |
| COX5B          | TCCATACAATATGCTACCTCCAAA              | ACAGATGCAGCCCCTATTC                   |                                                            |

**Control**

**Leucine**

**B-3L**

**B-3HK**

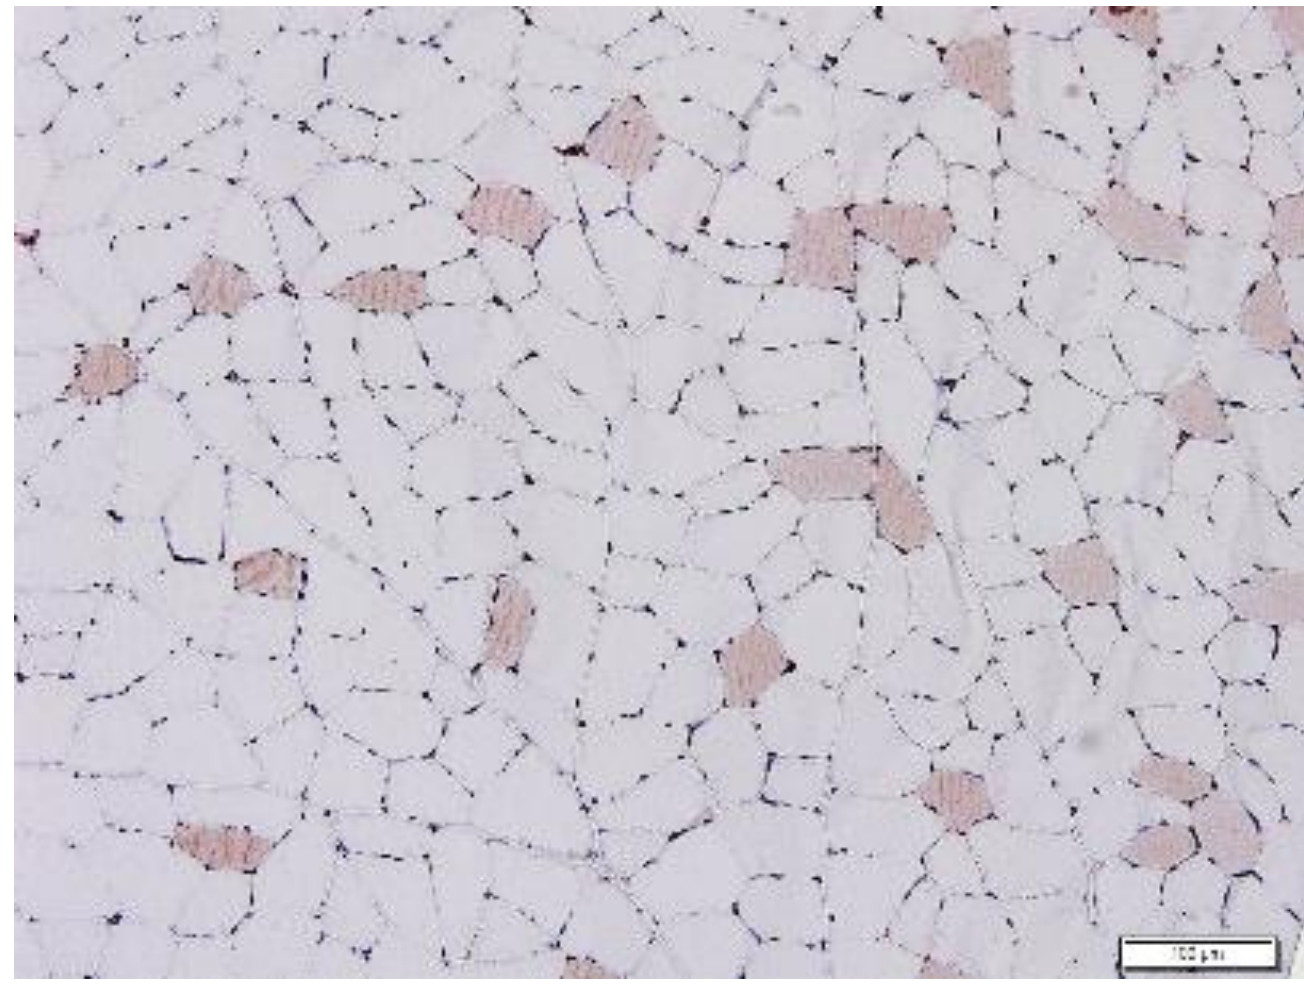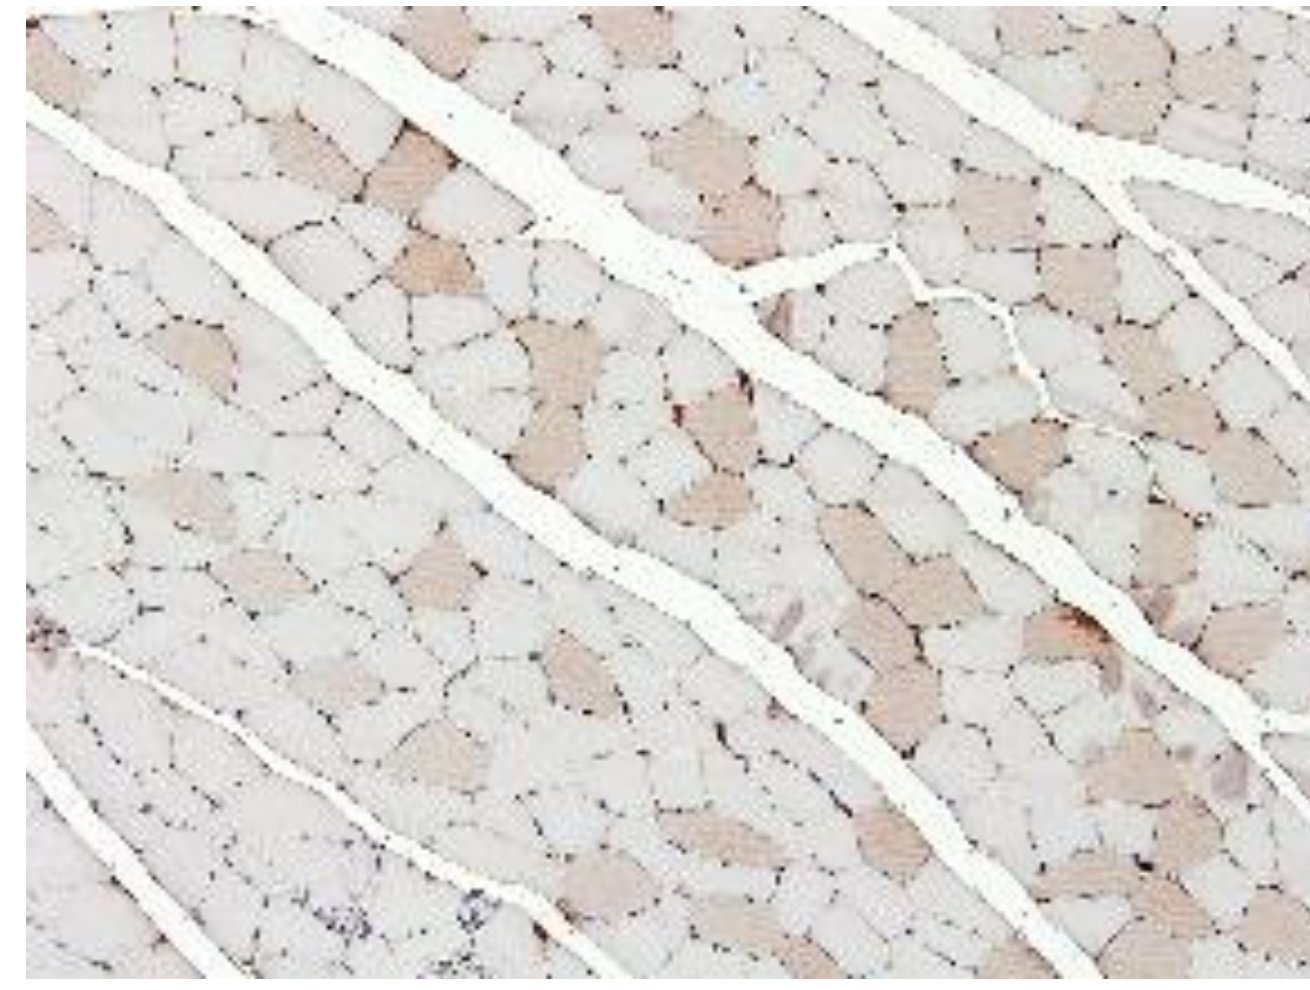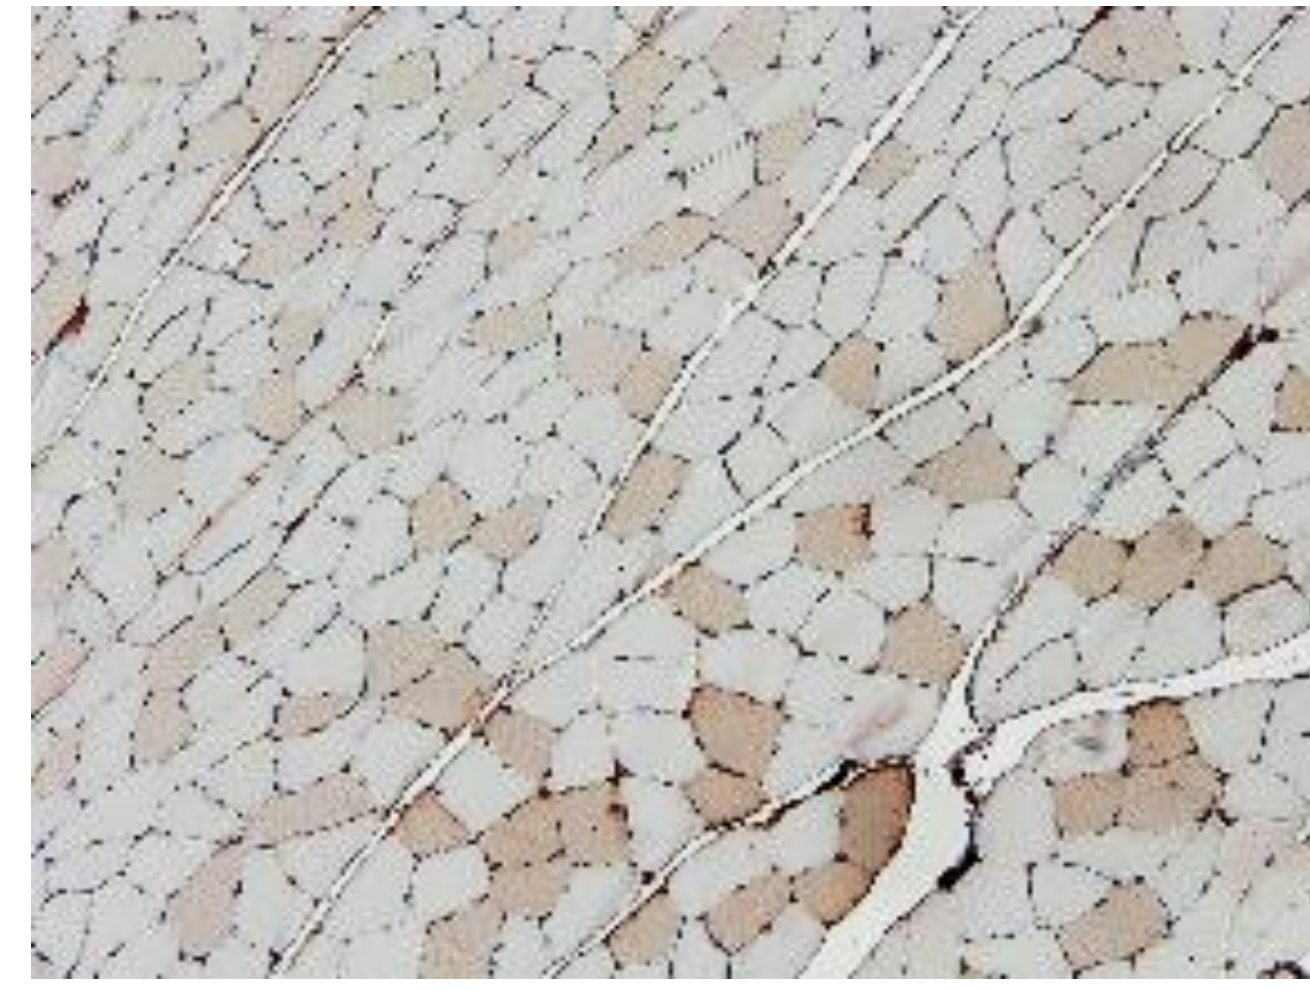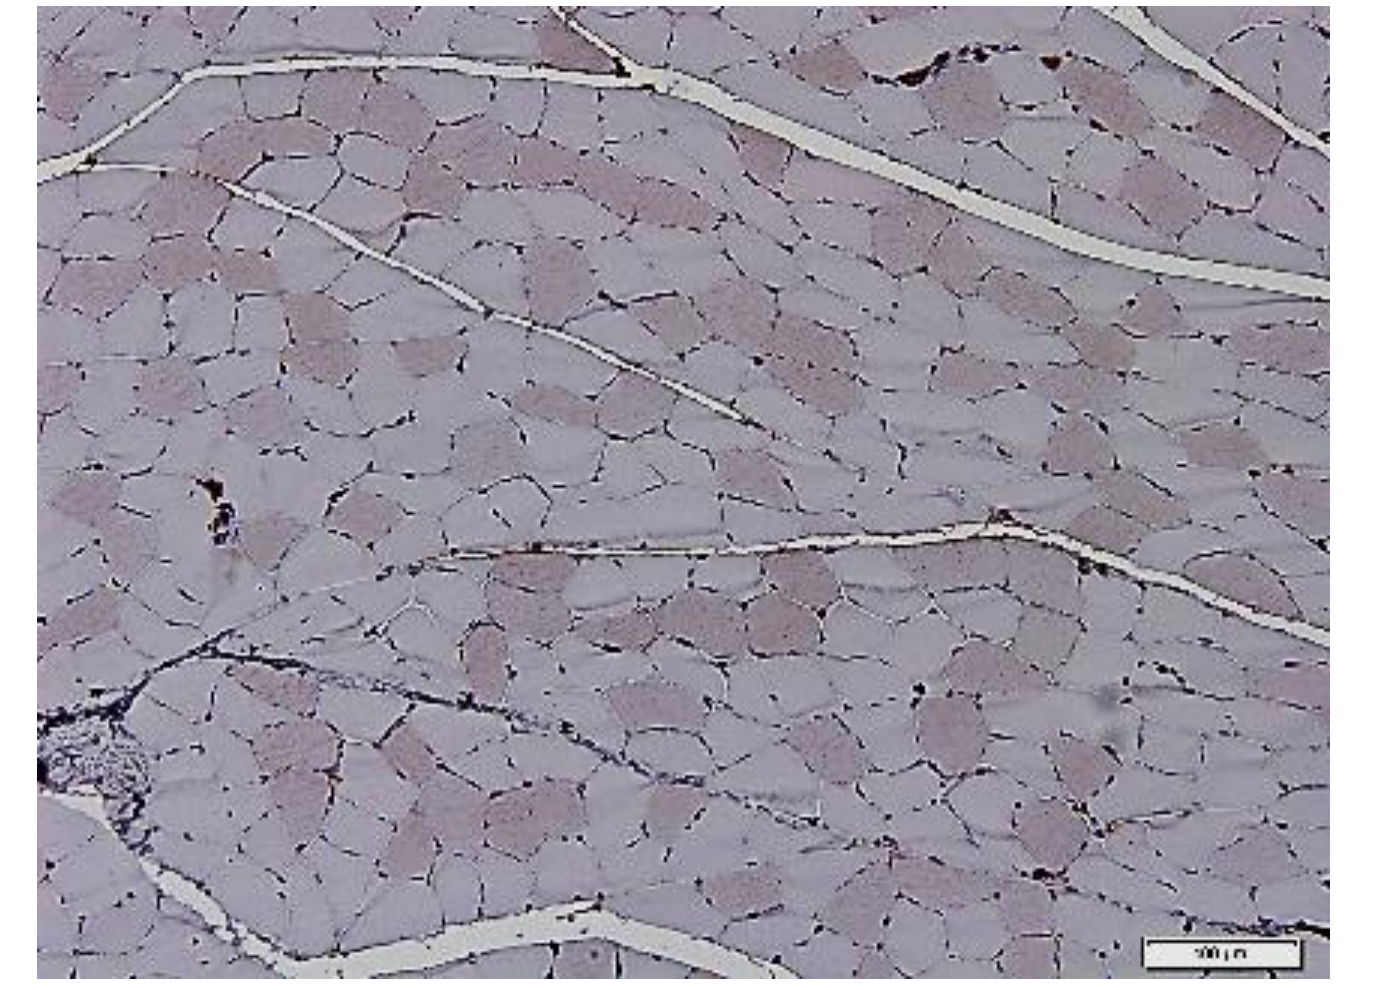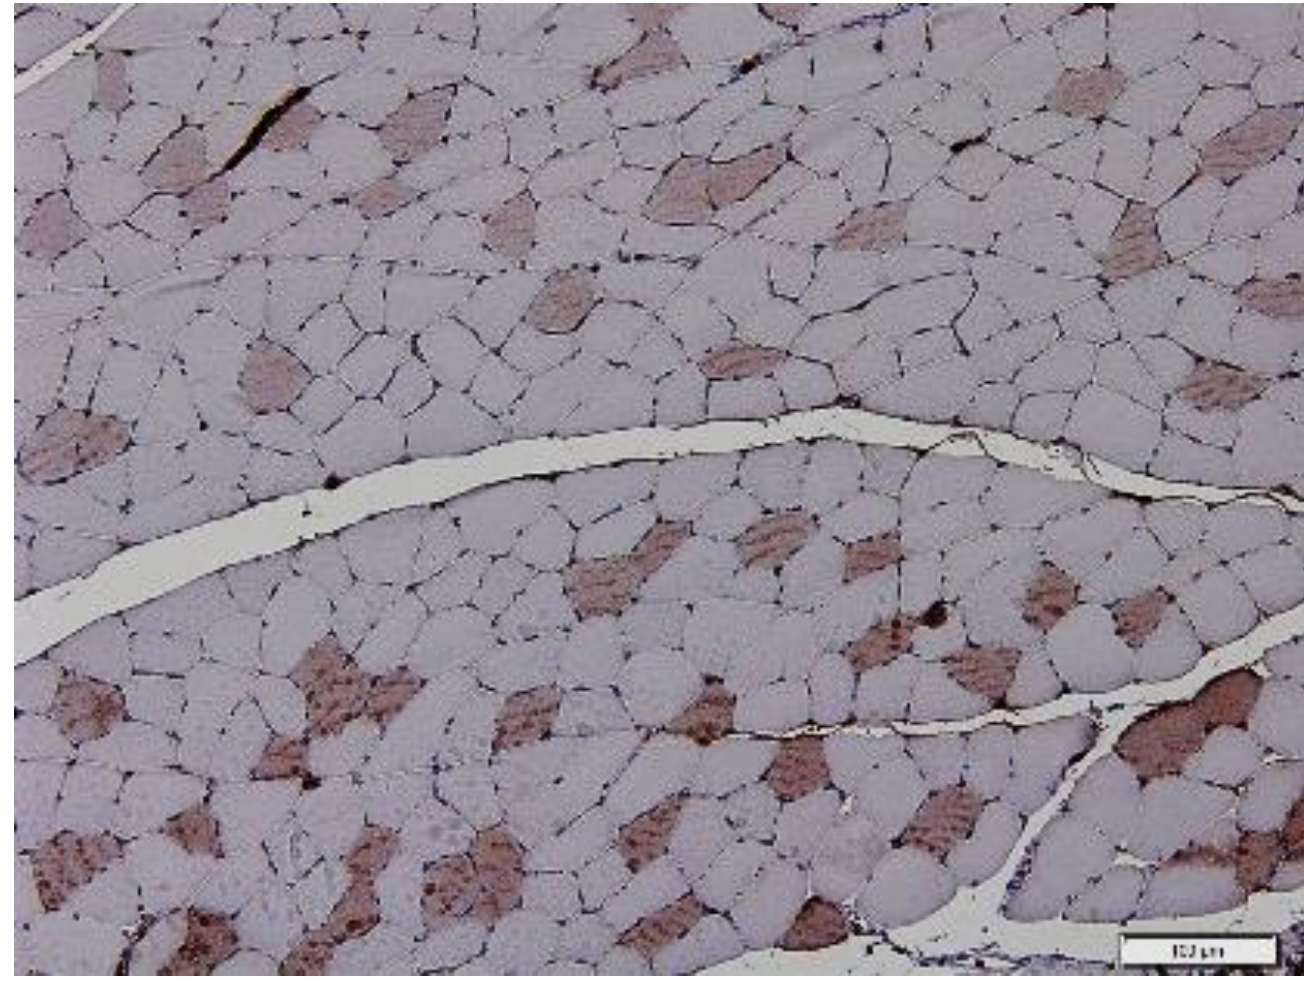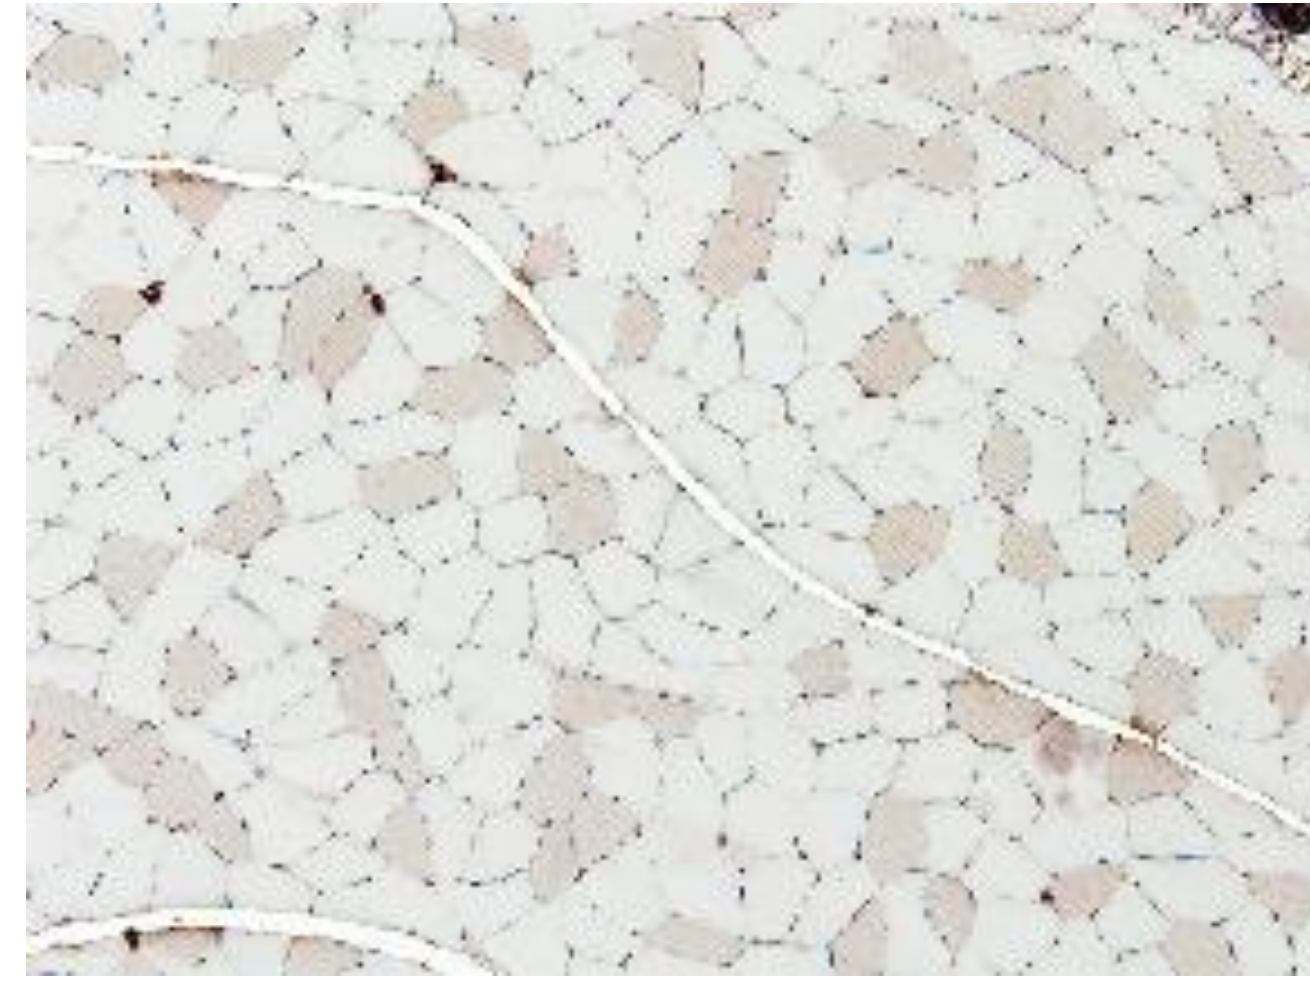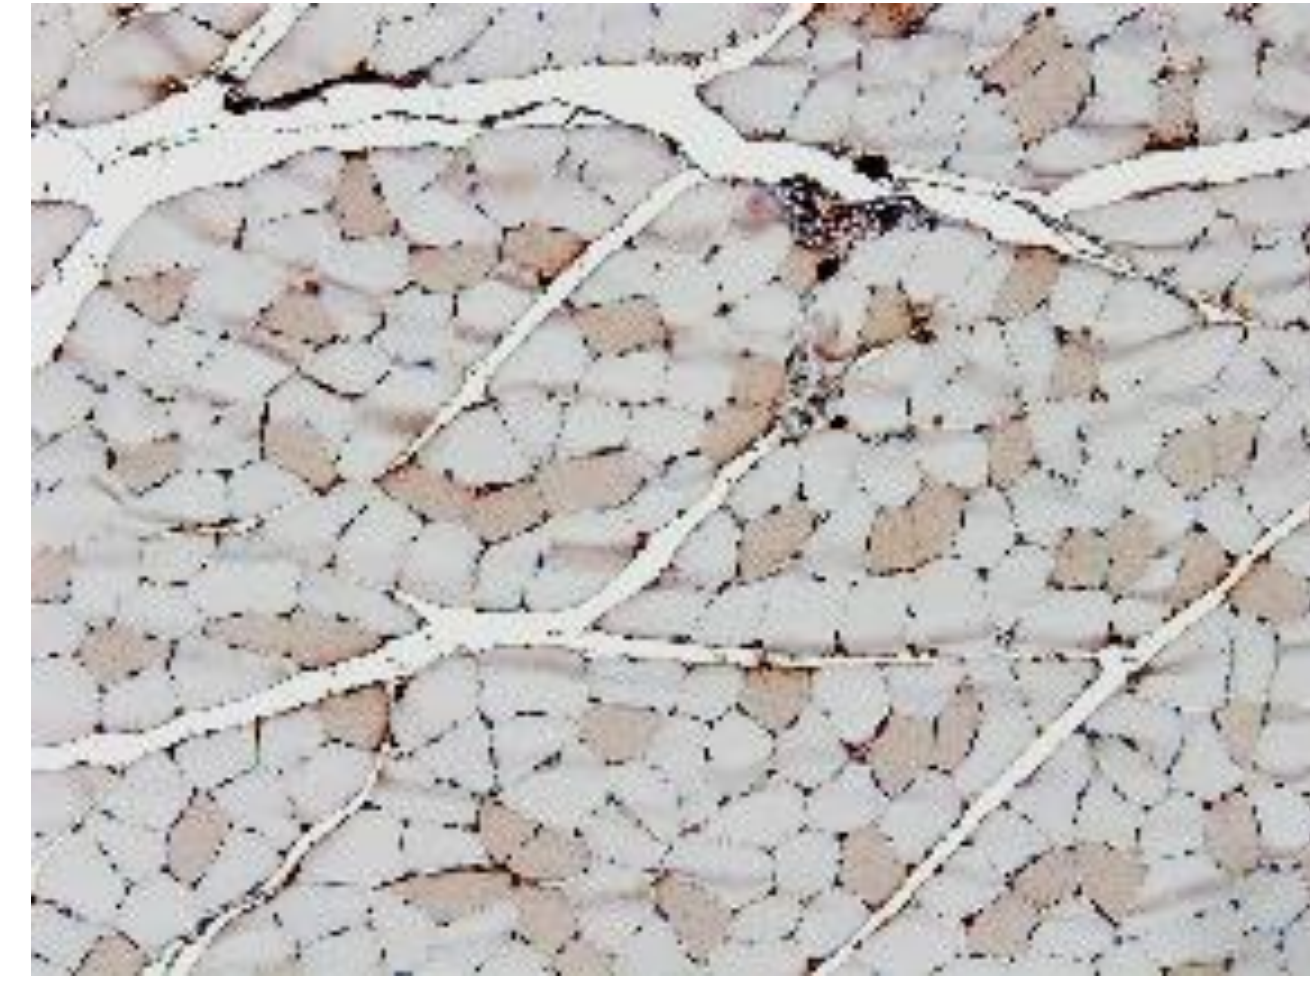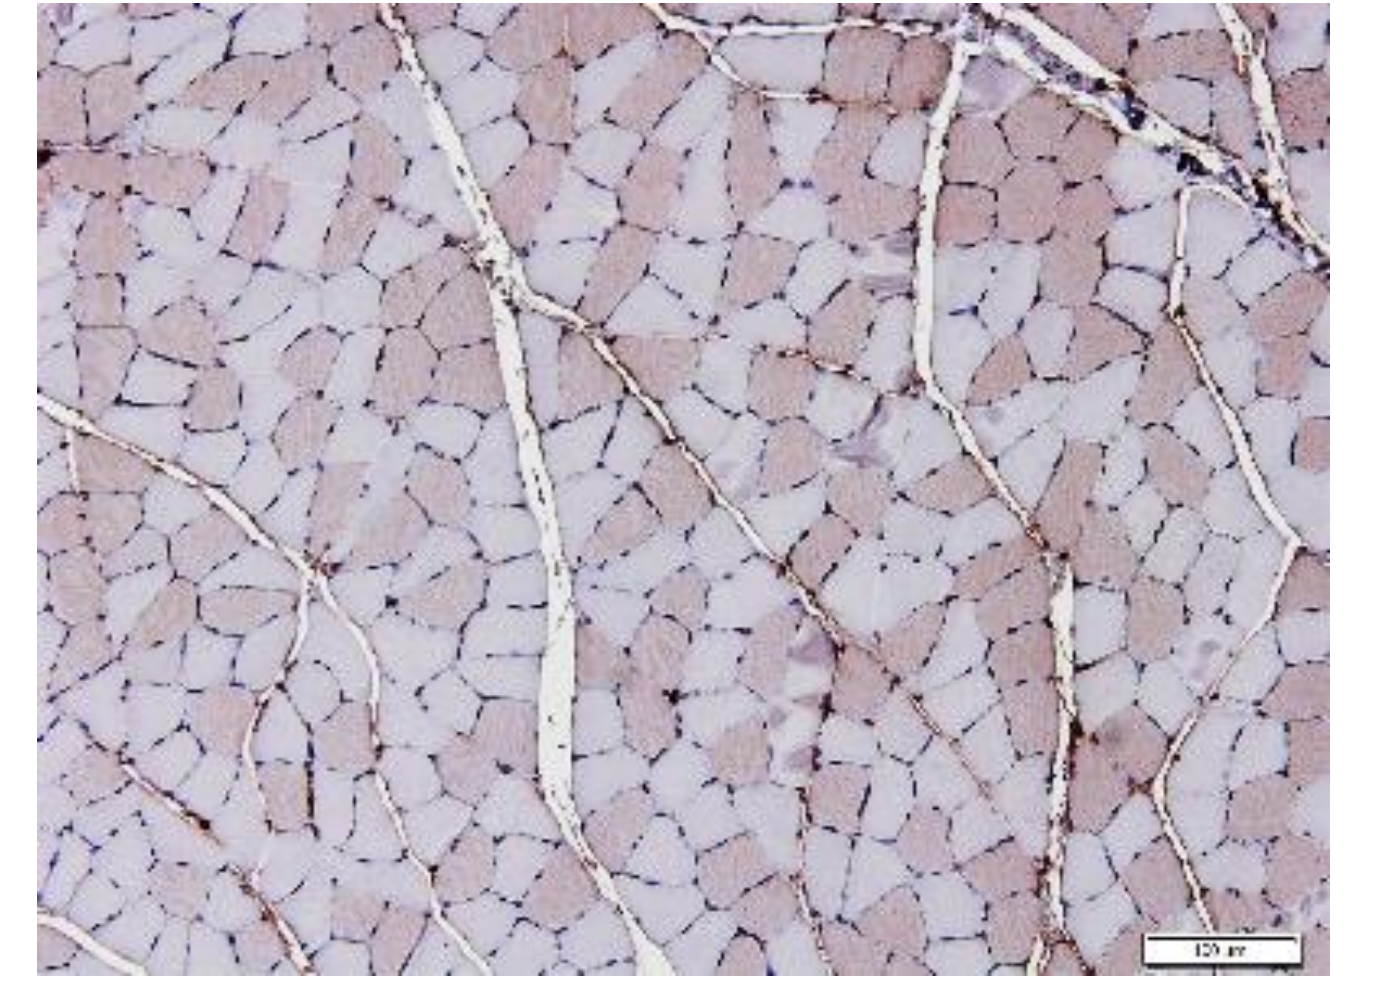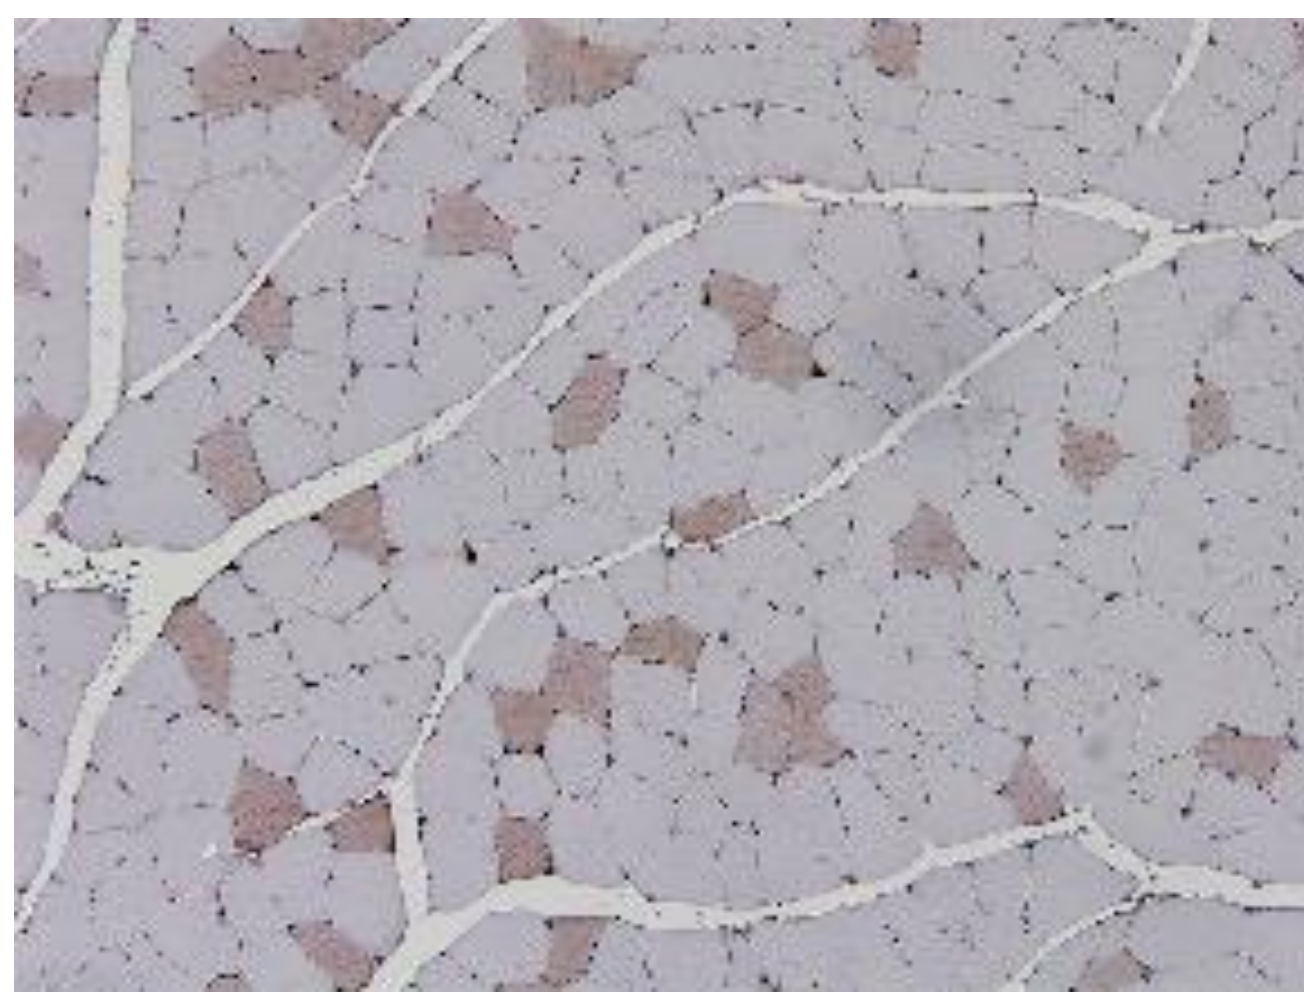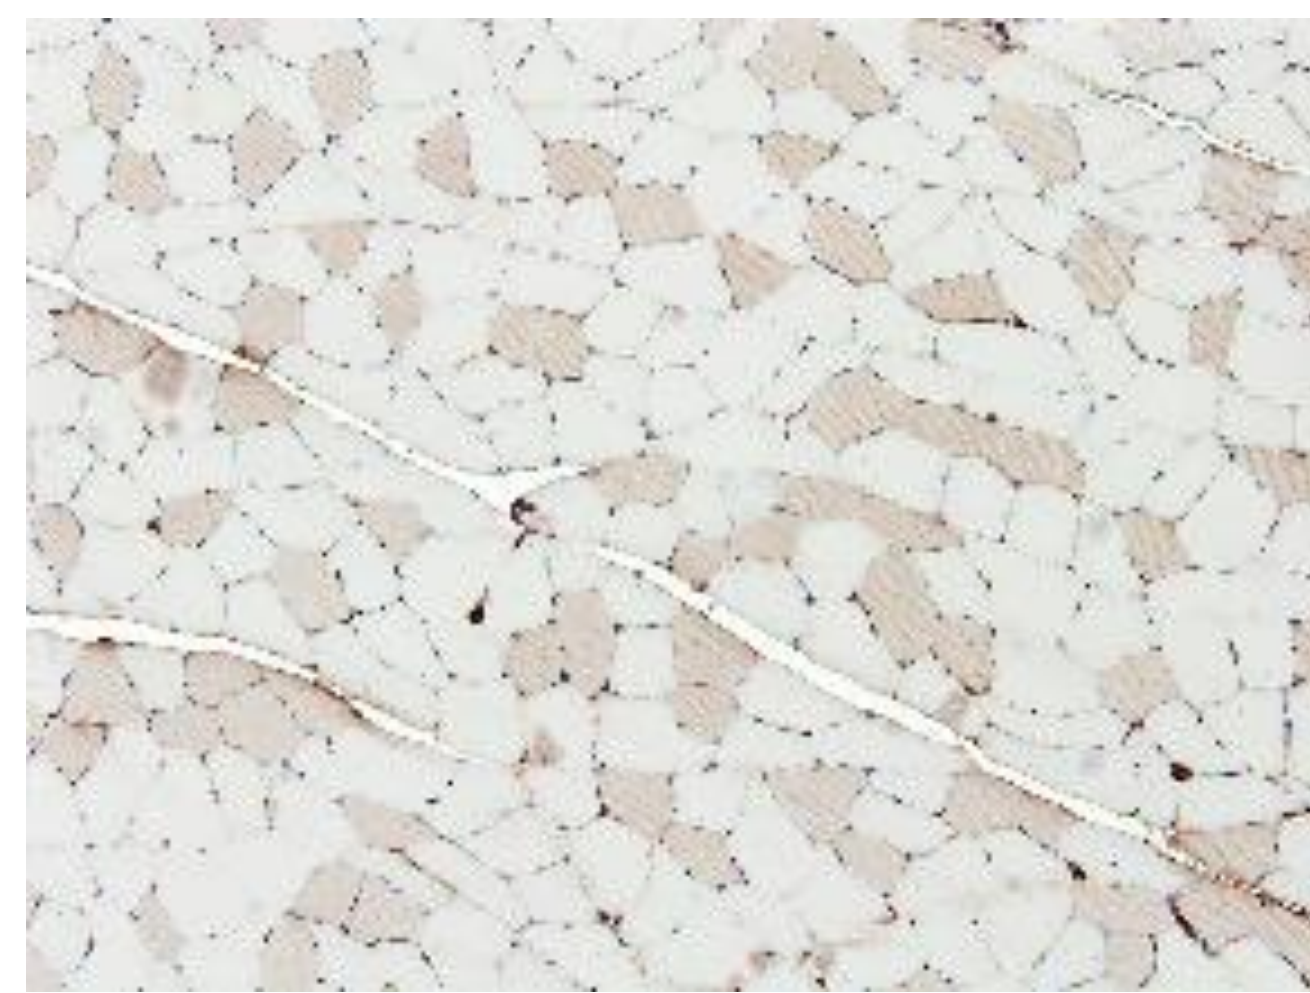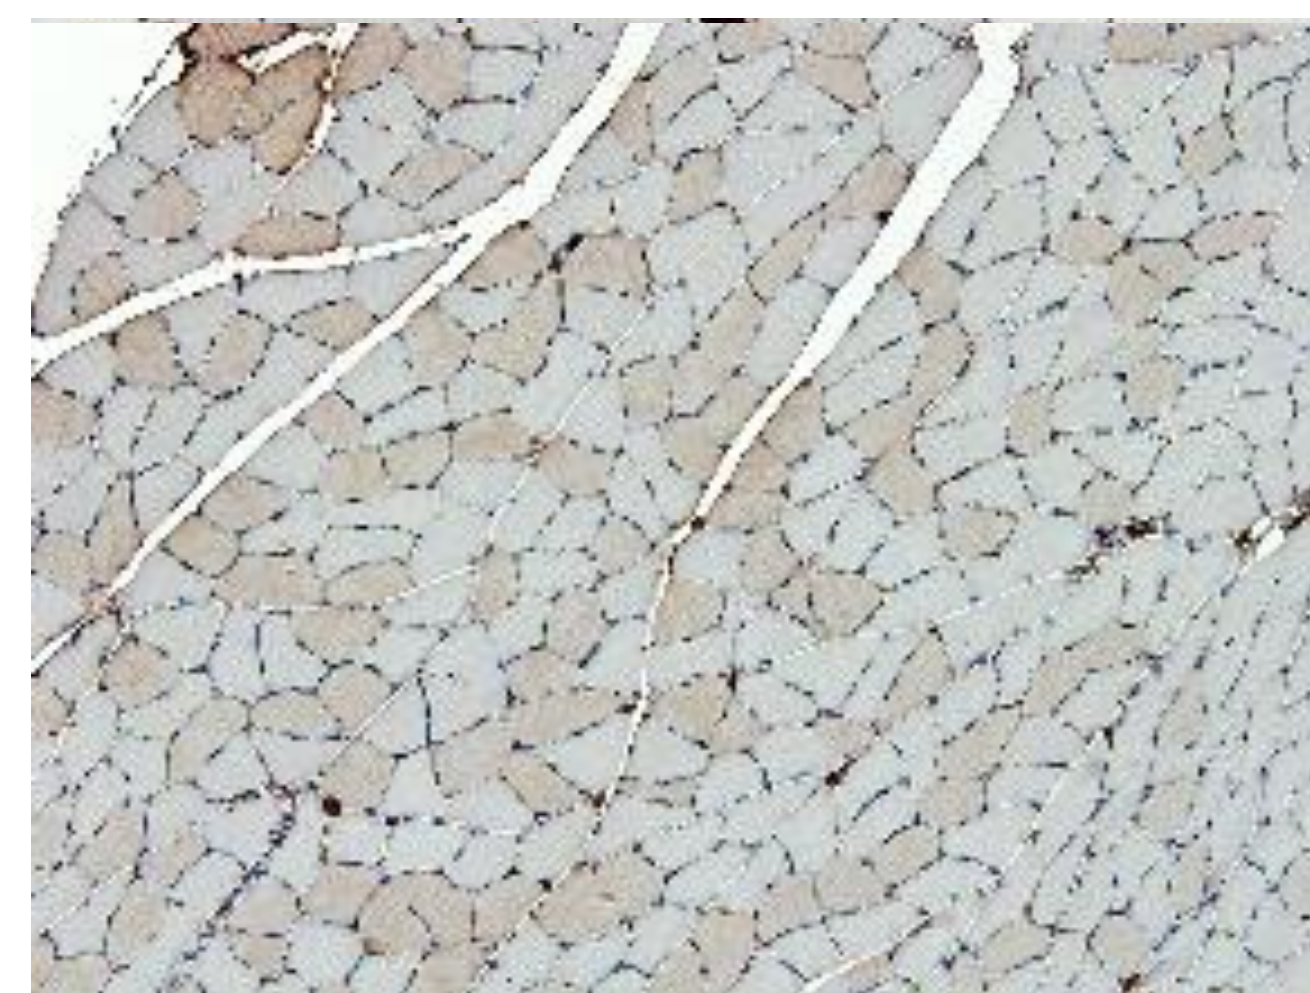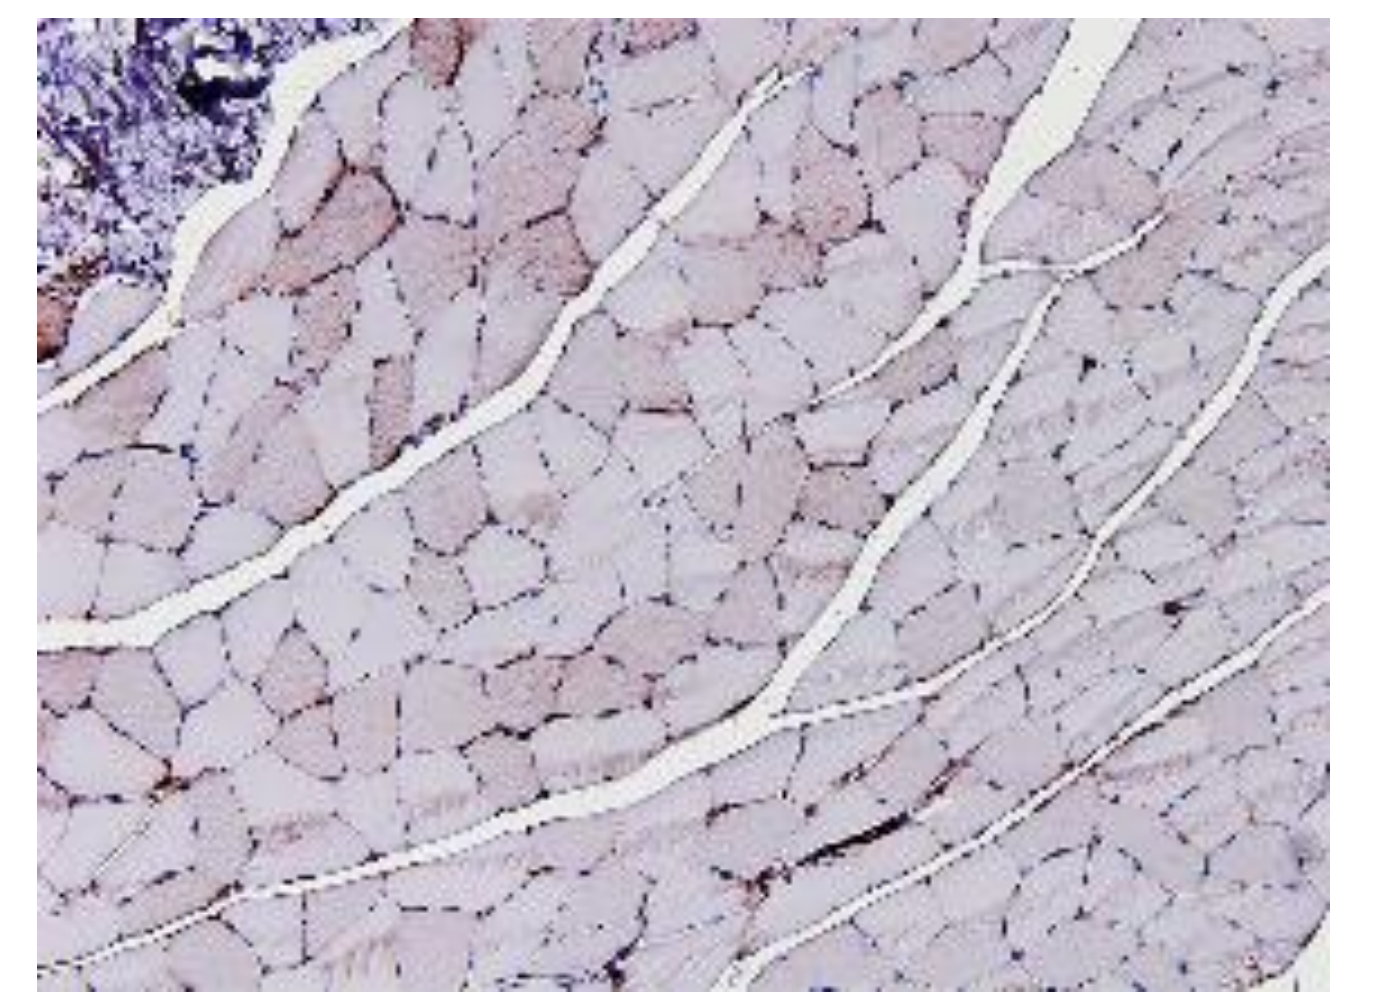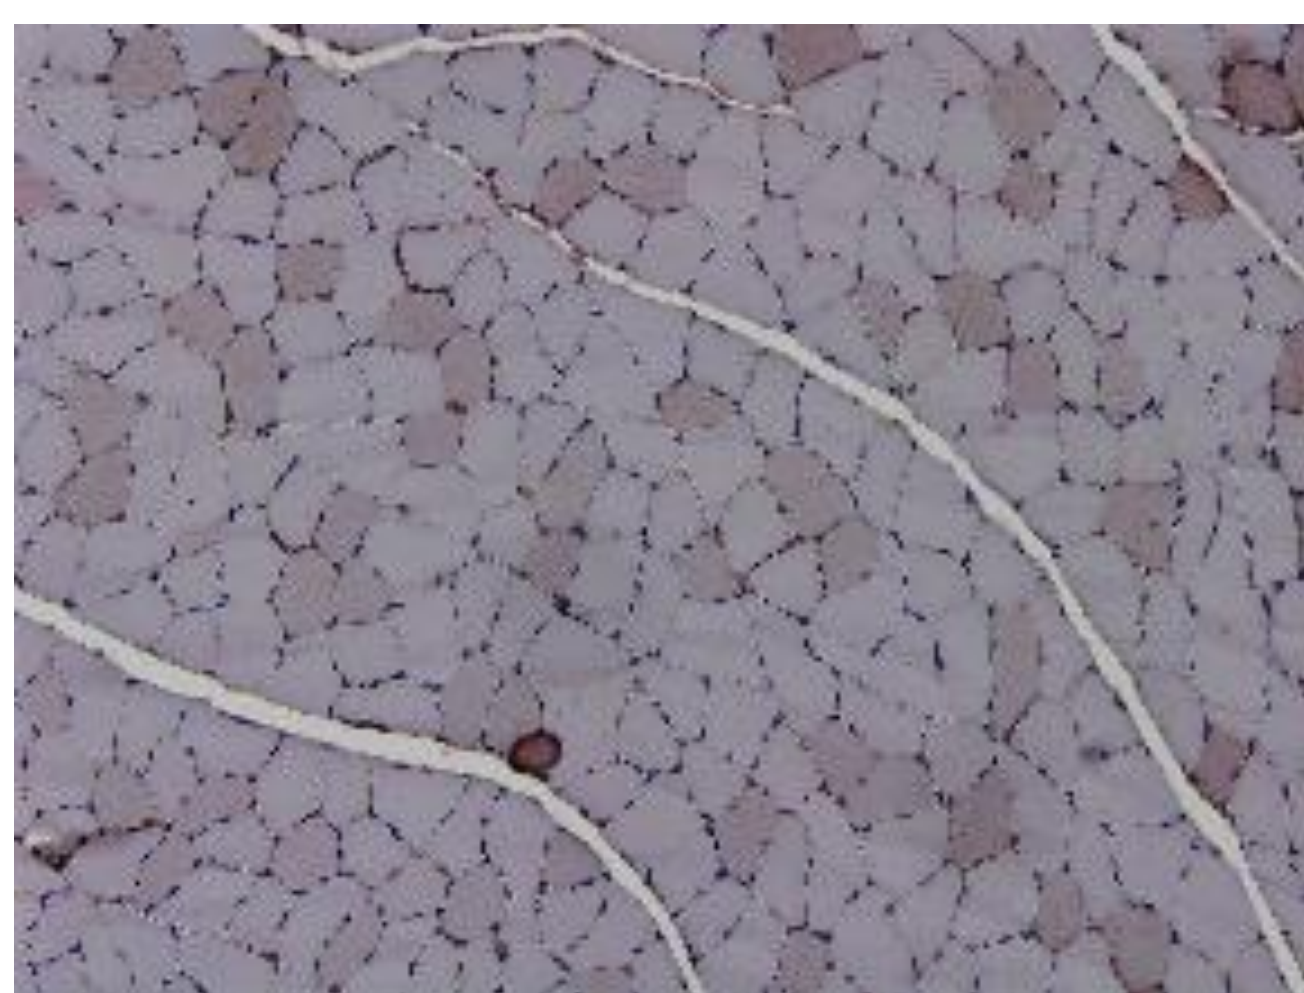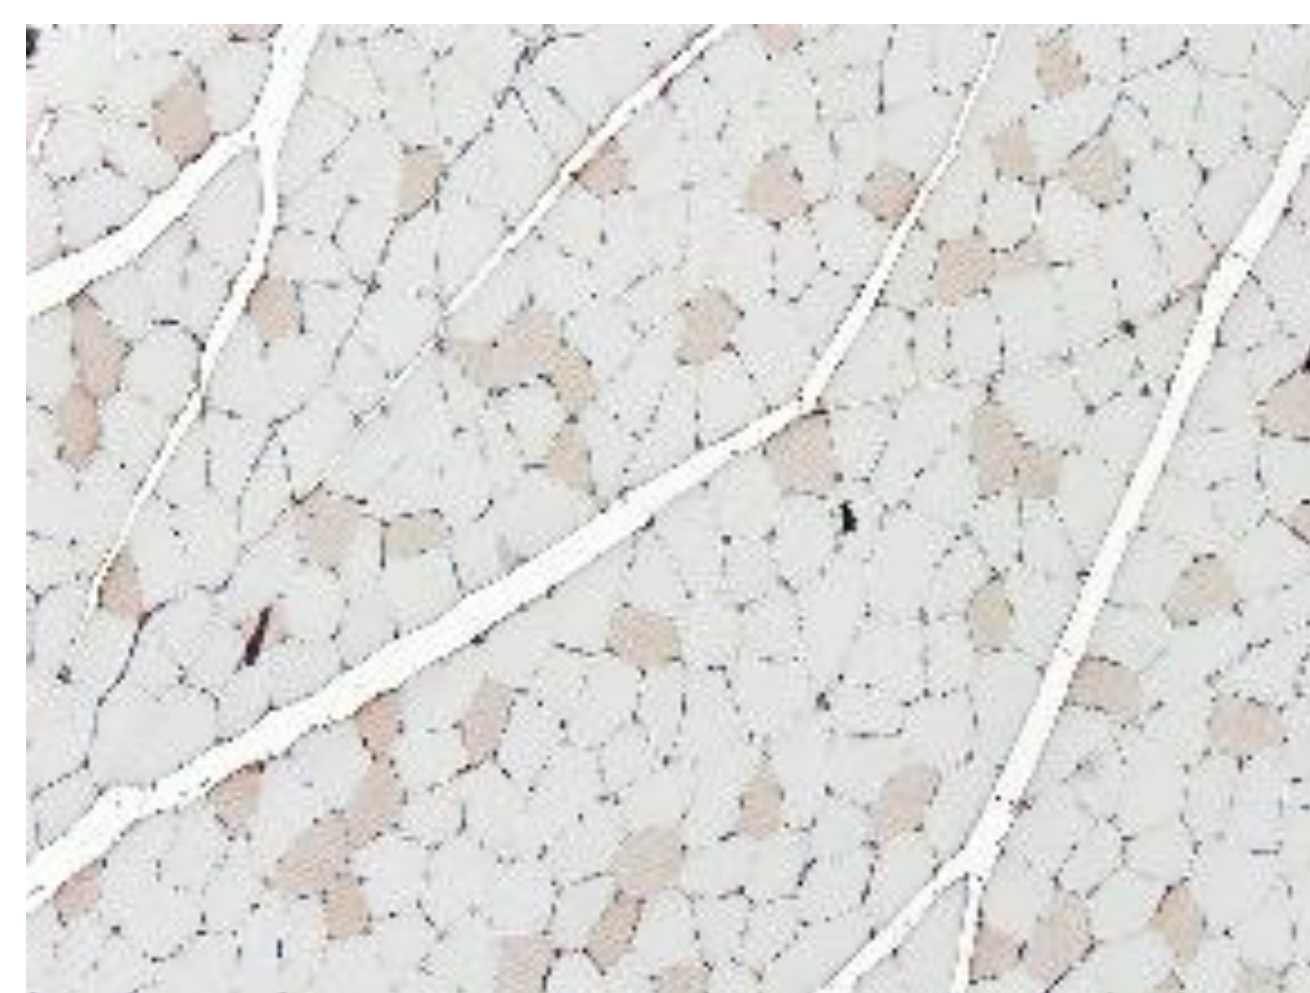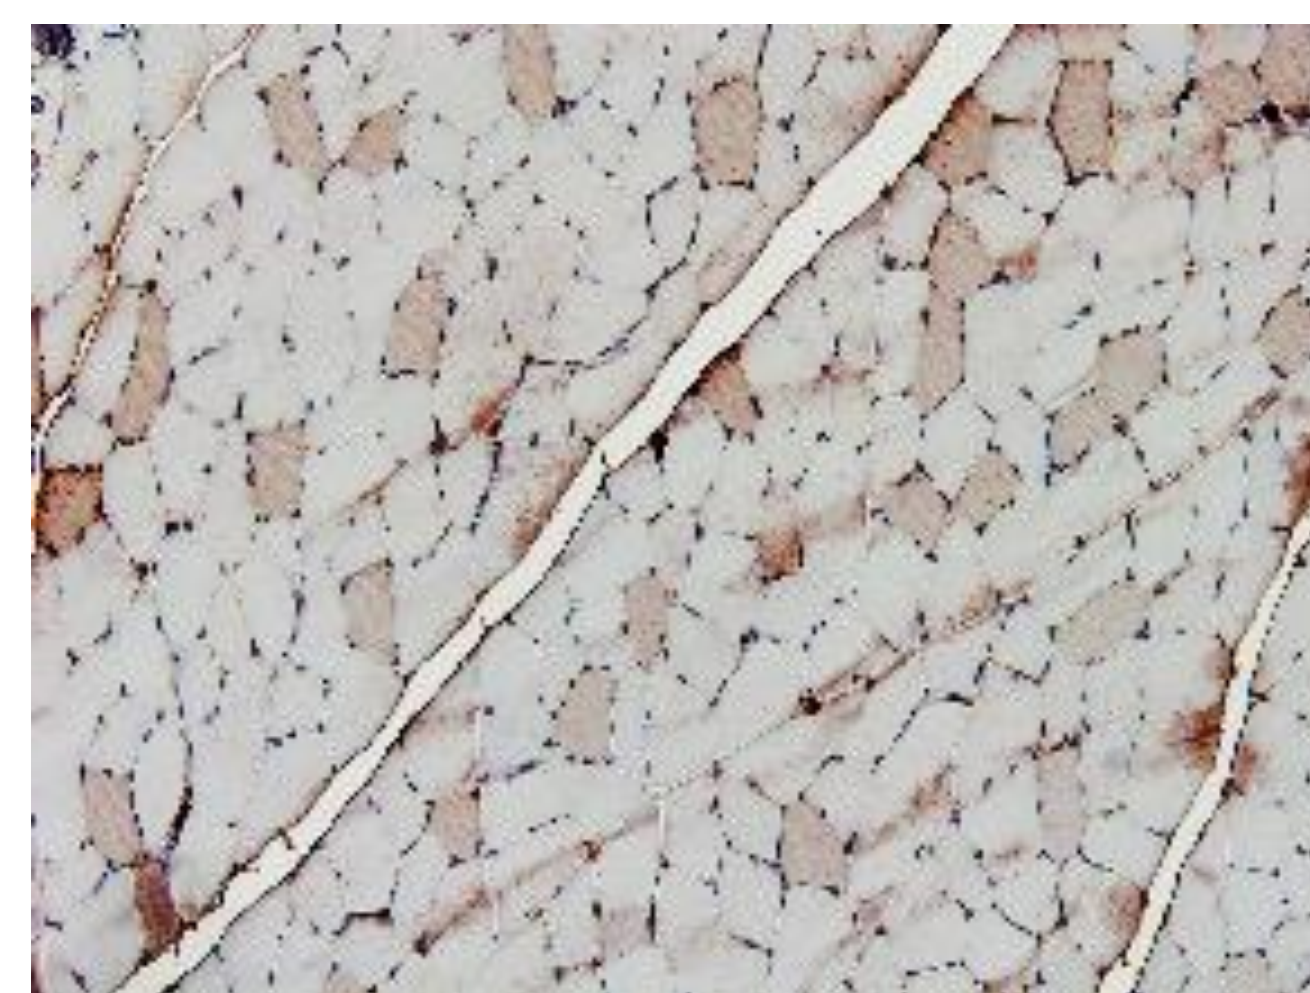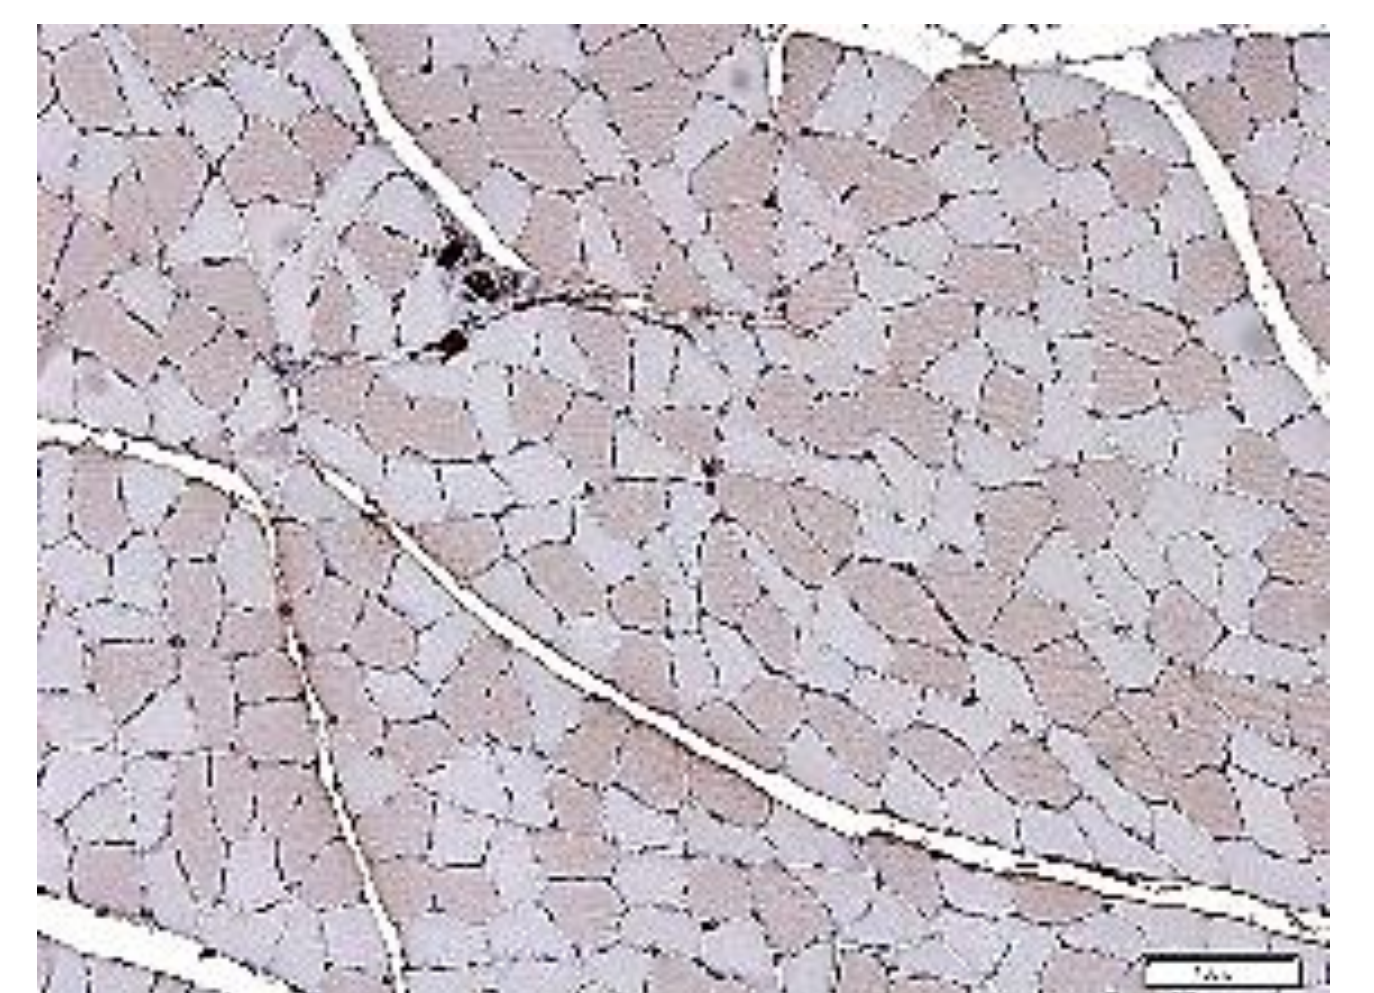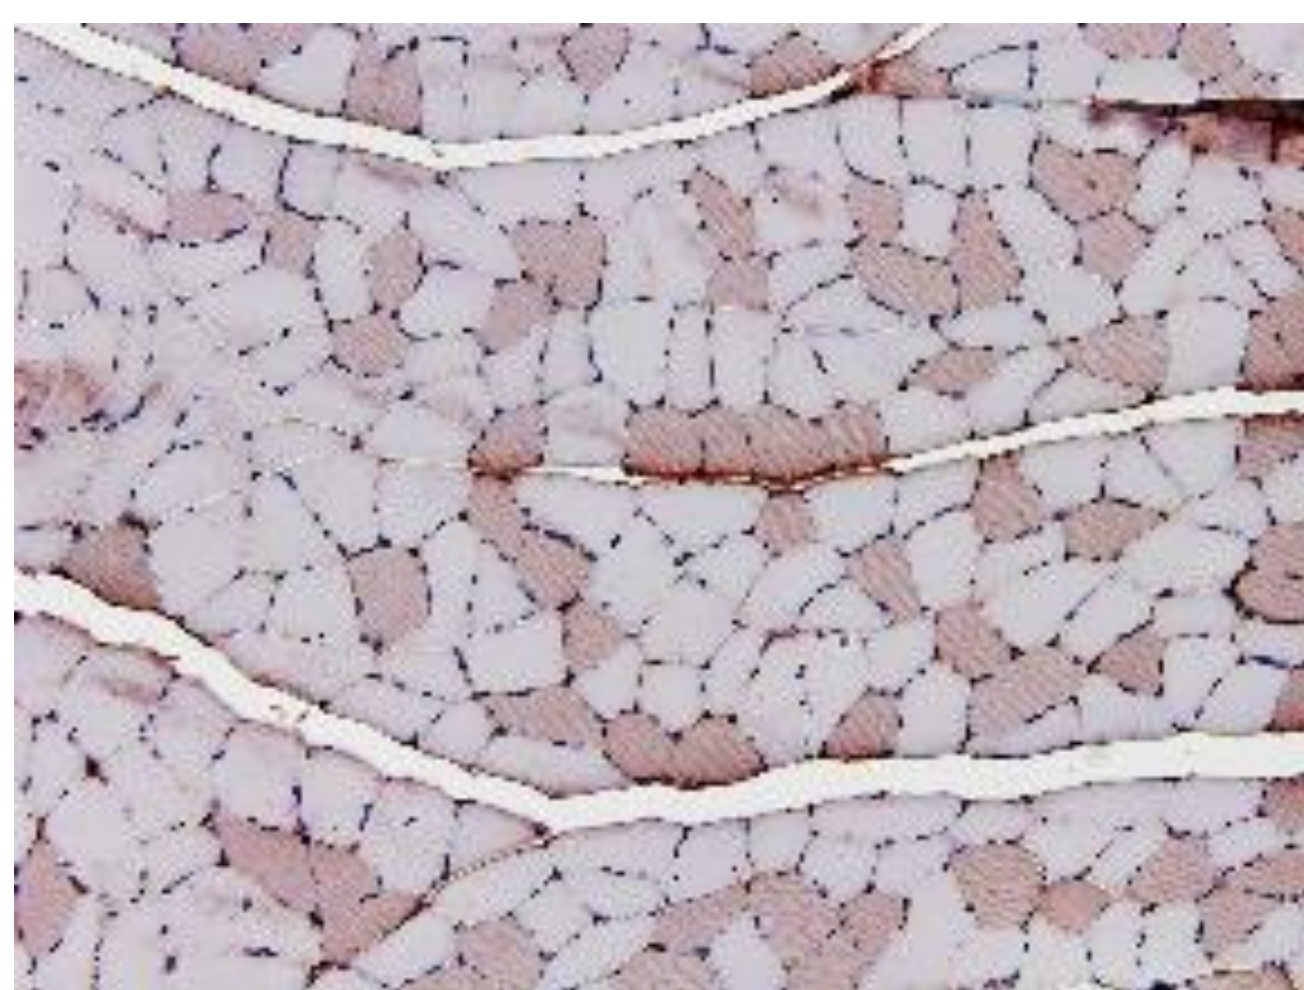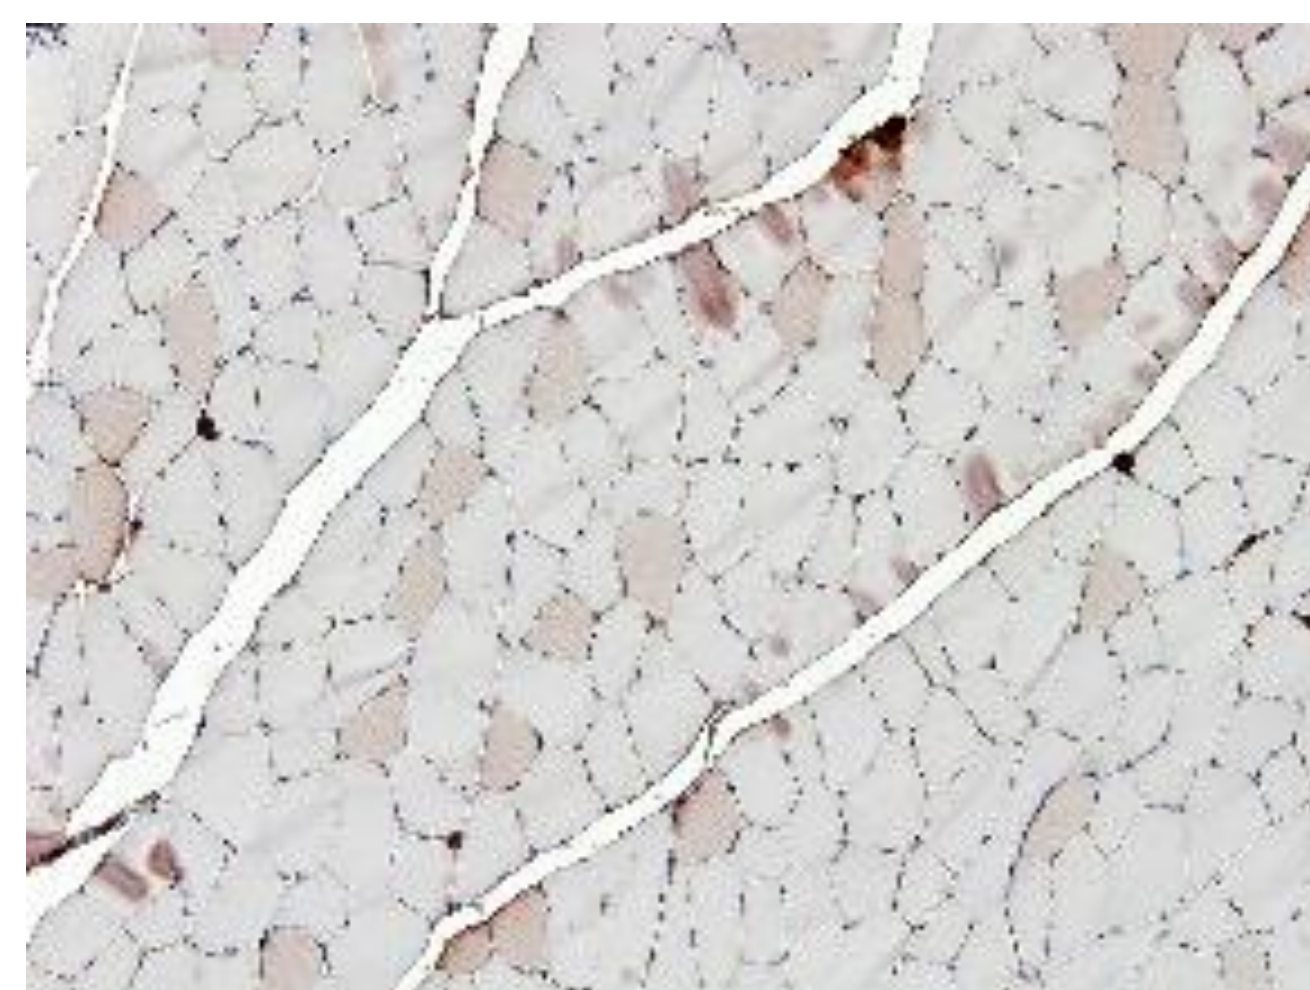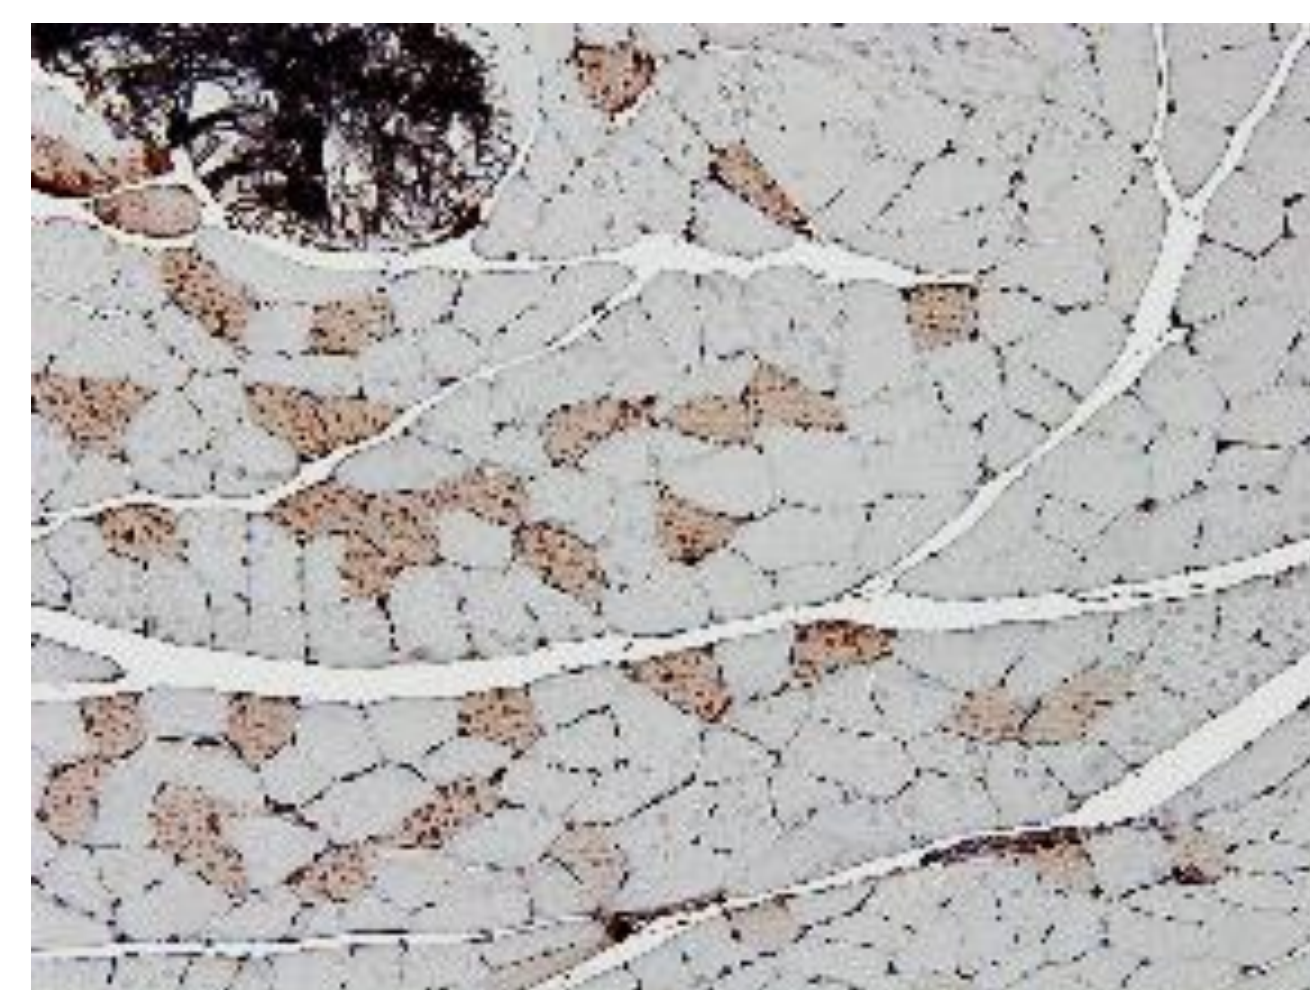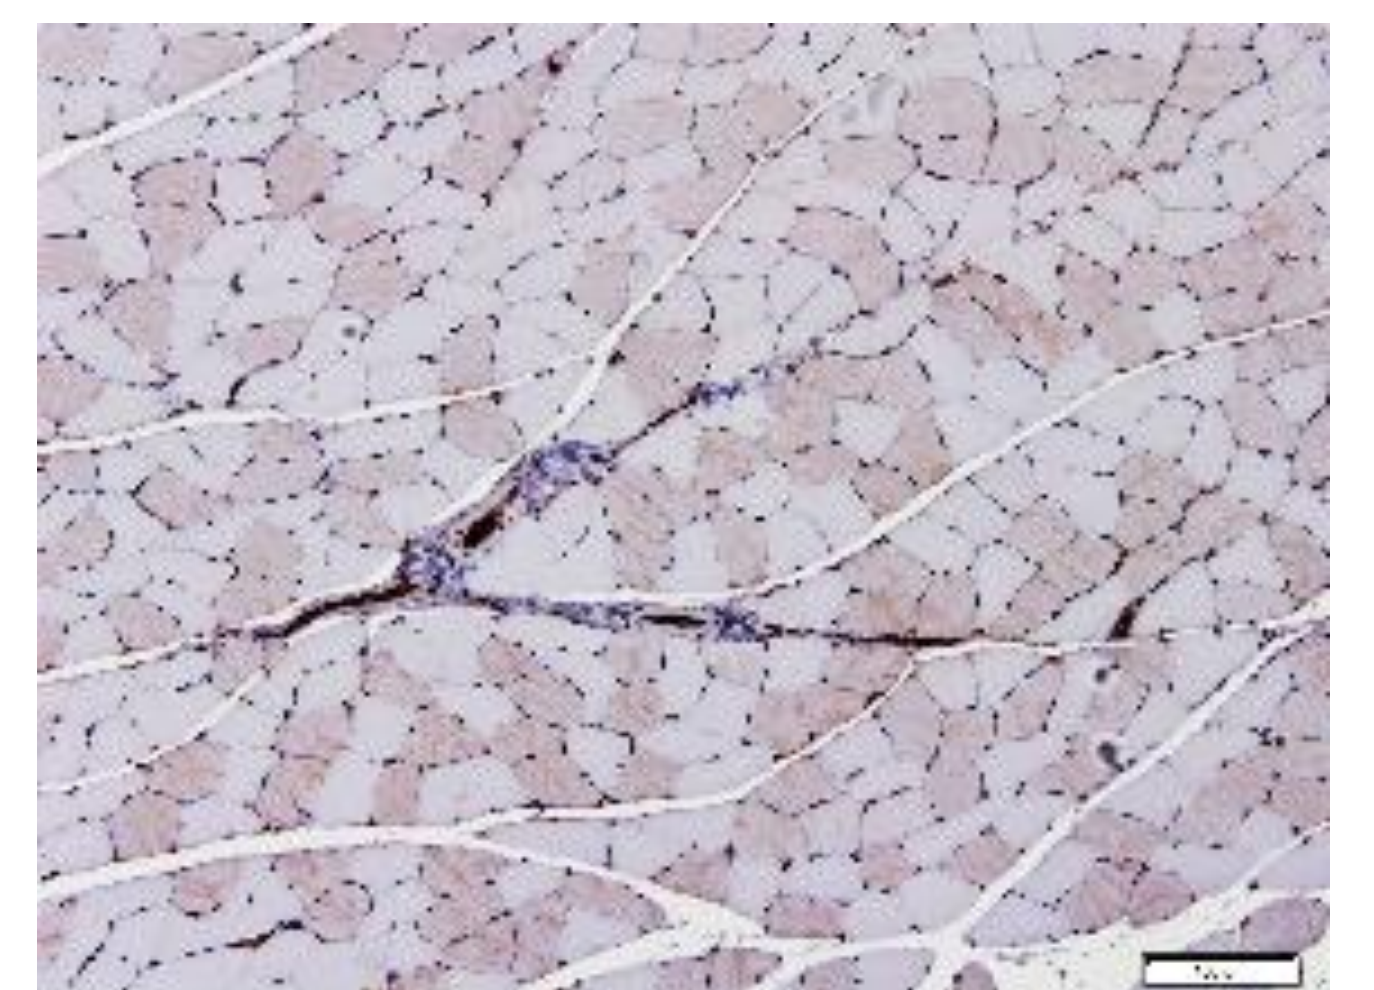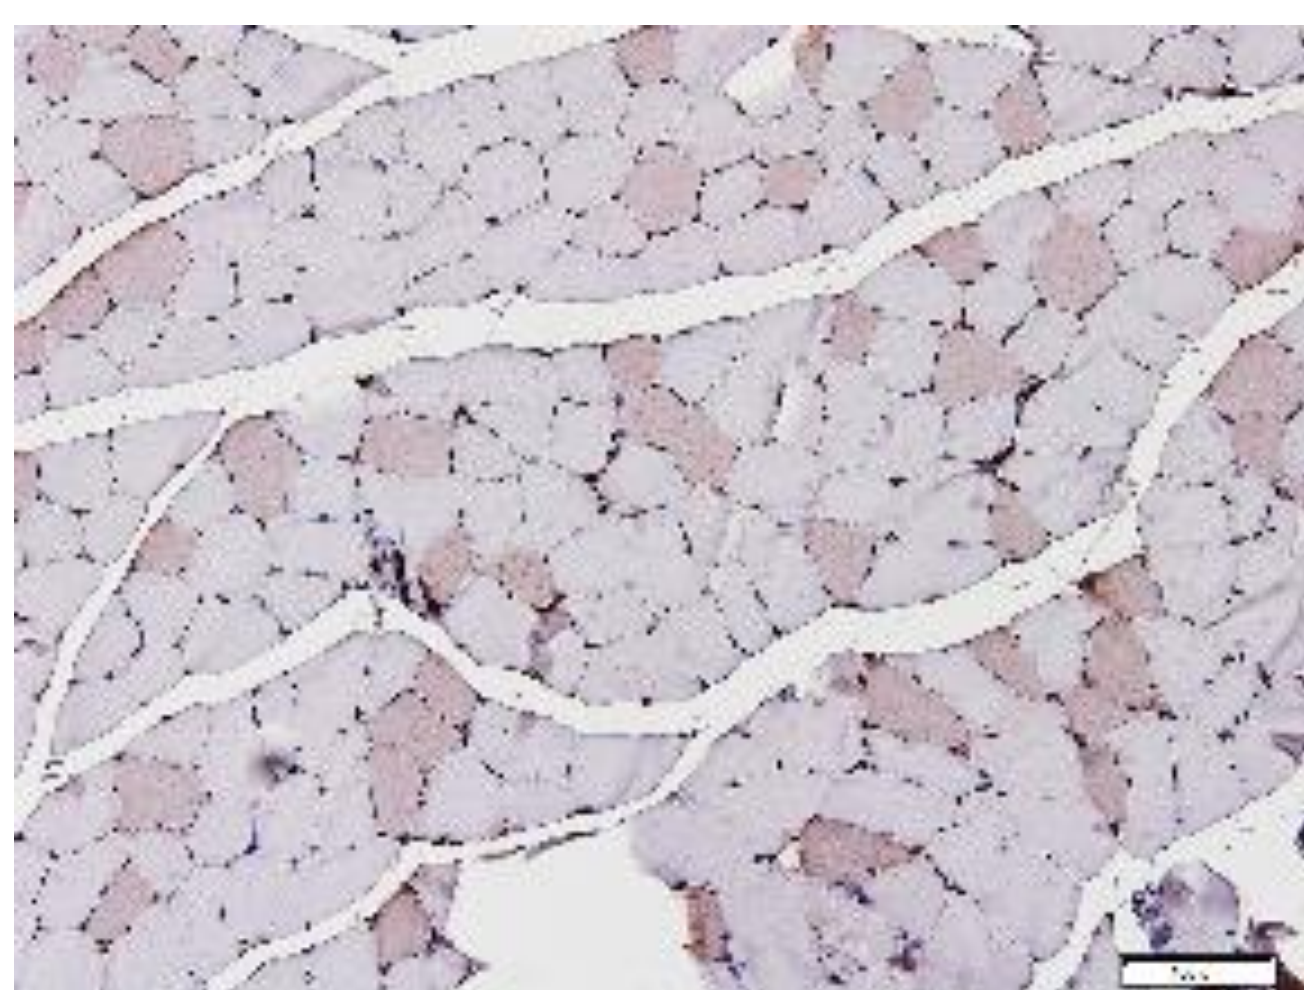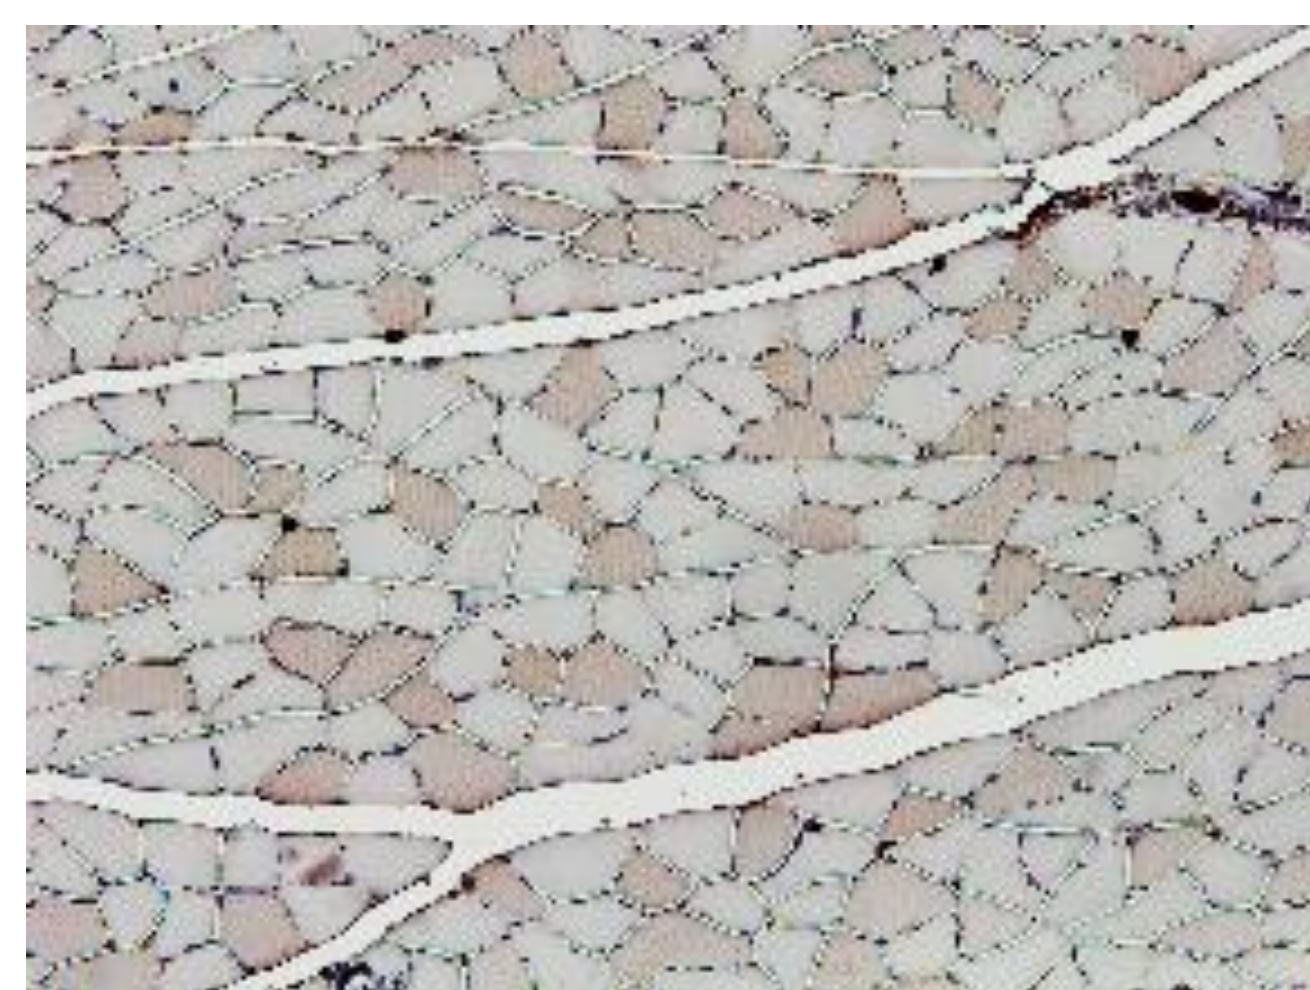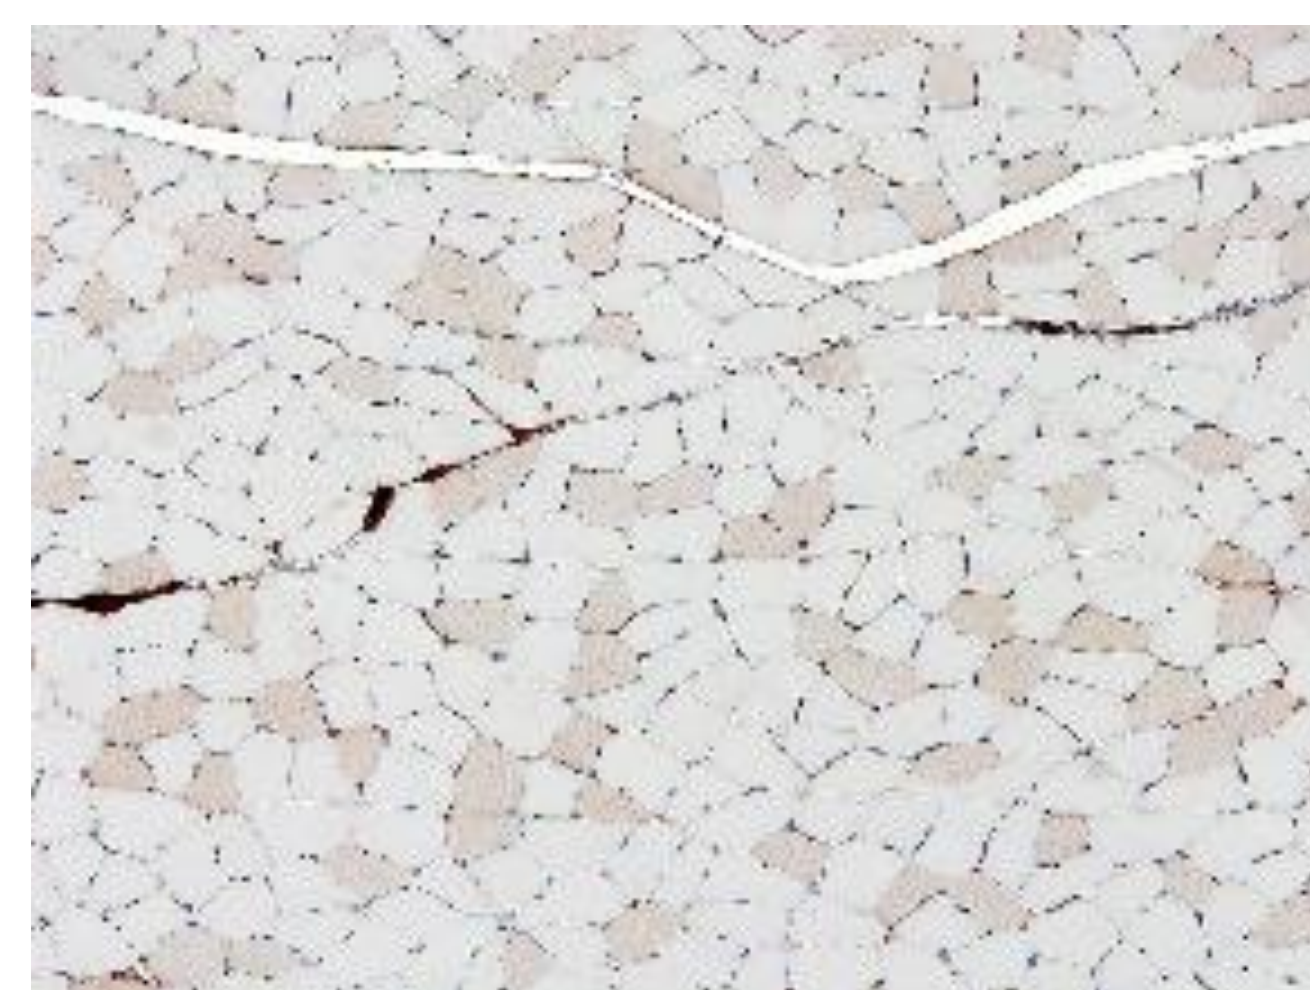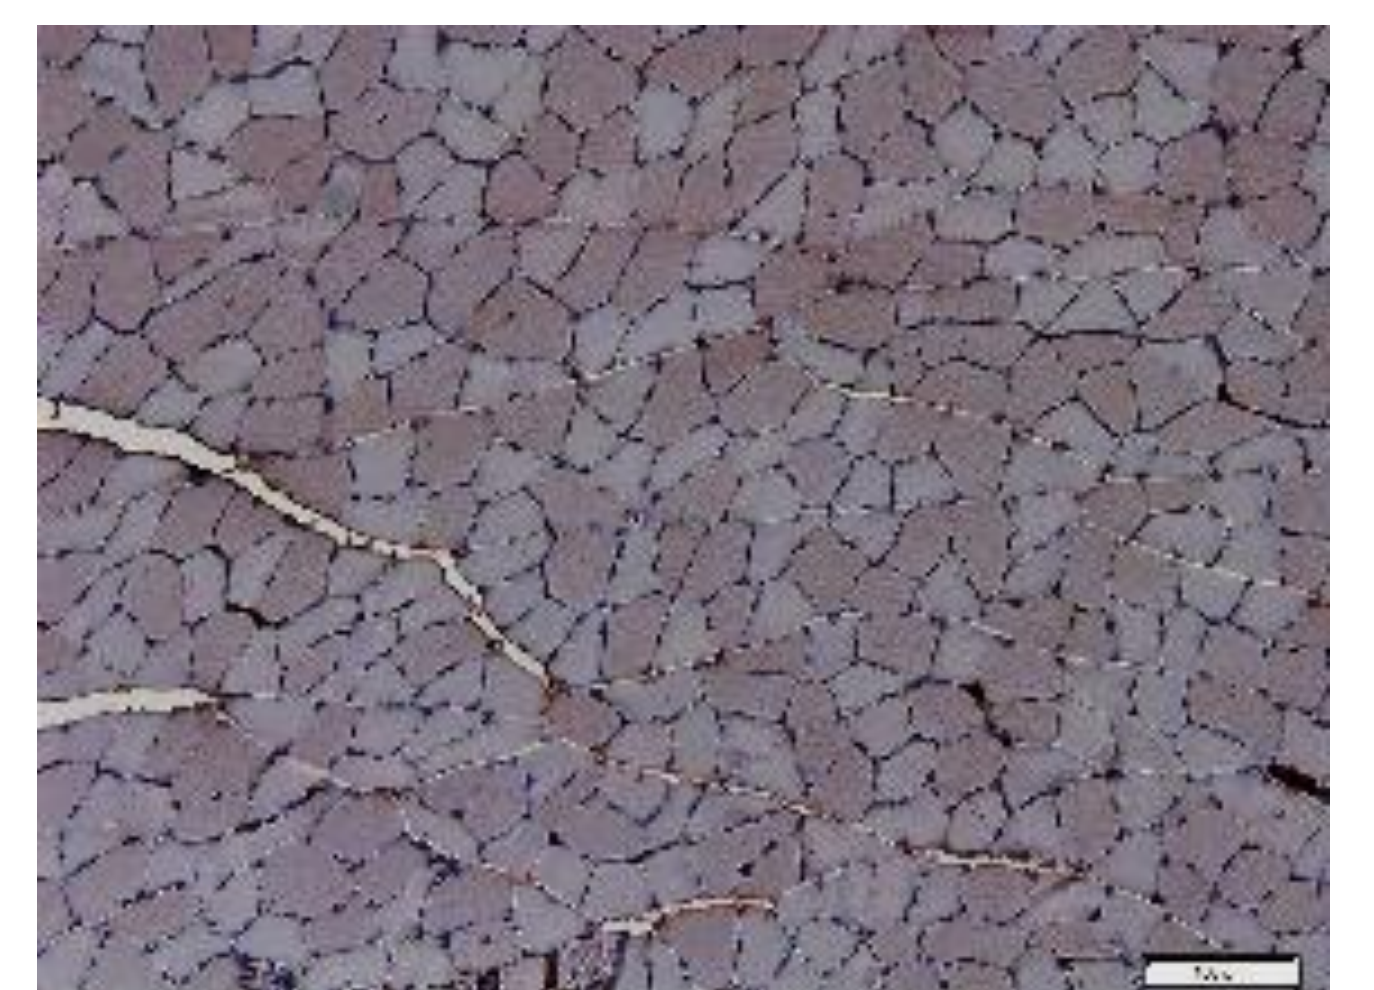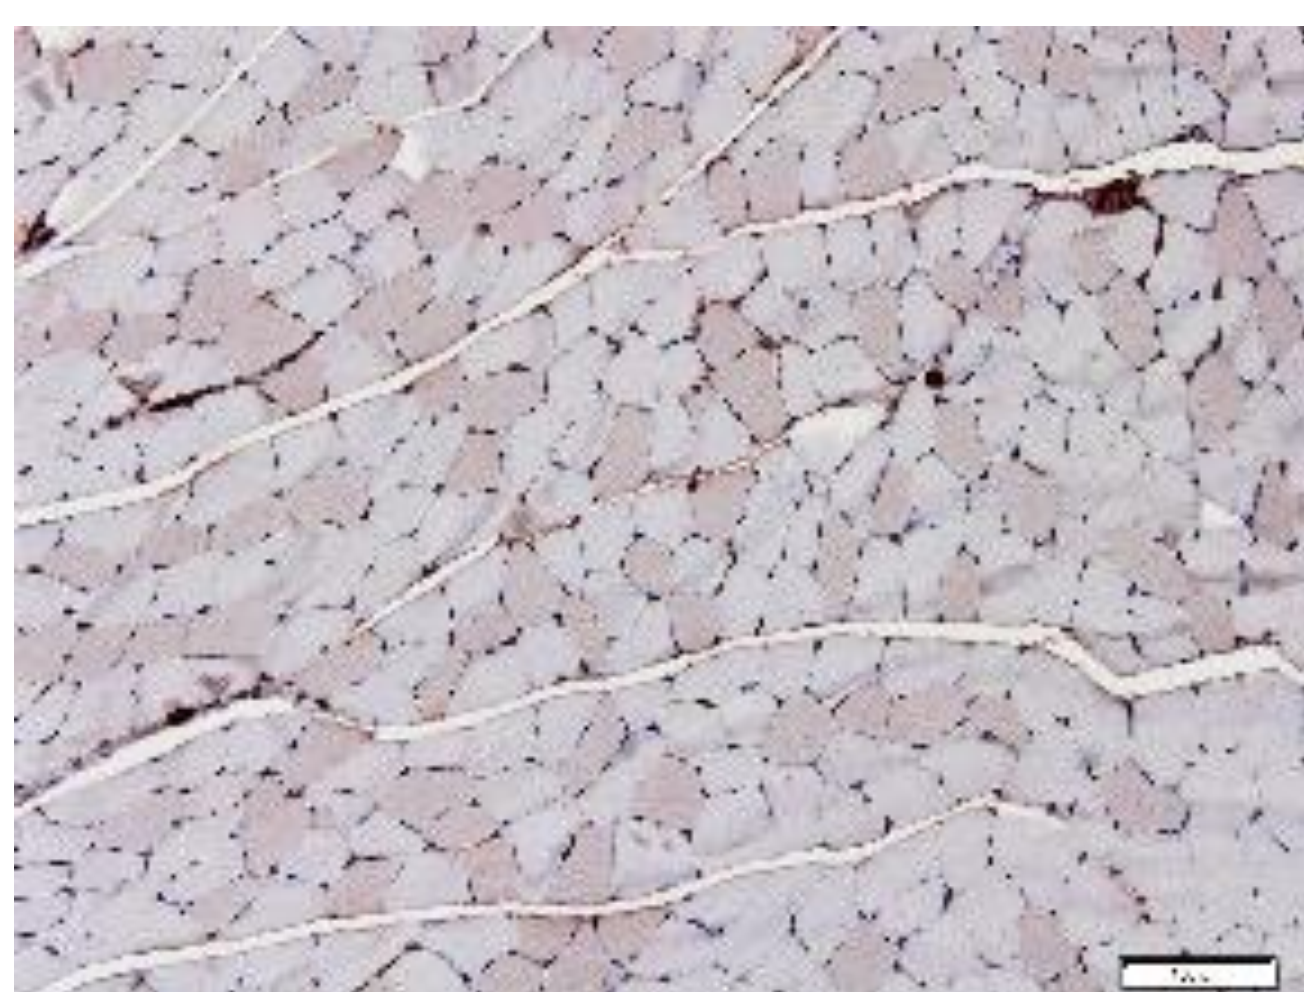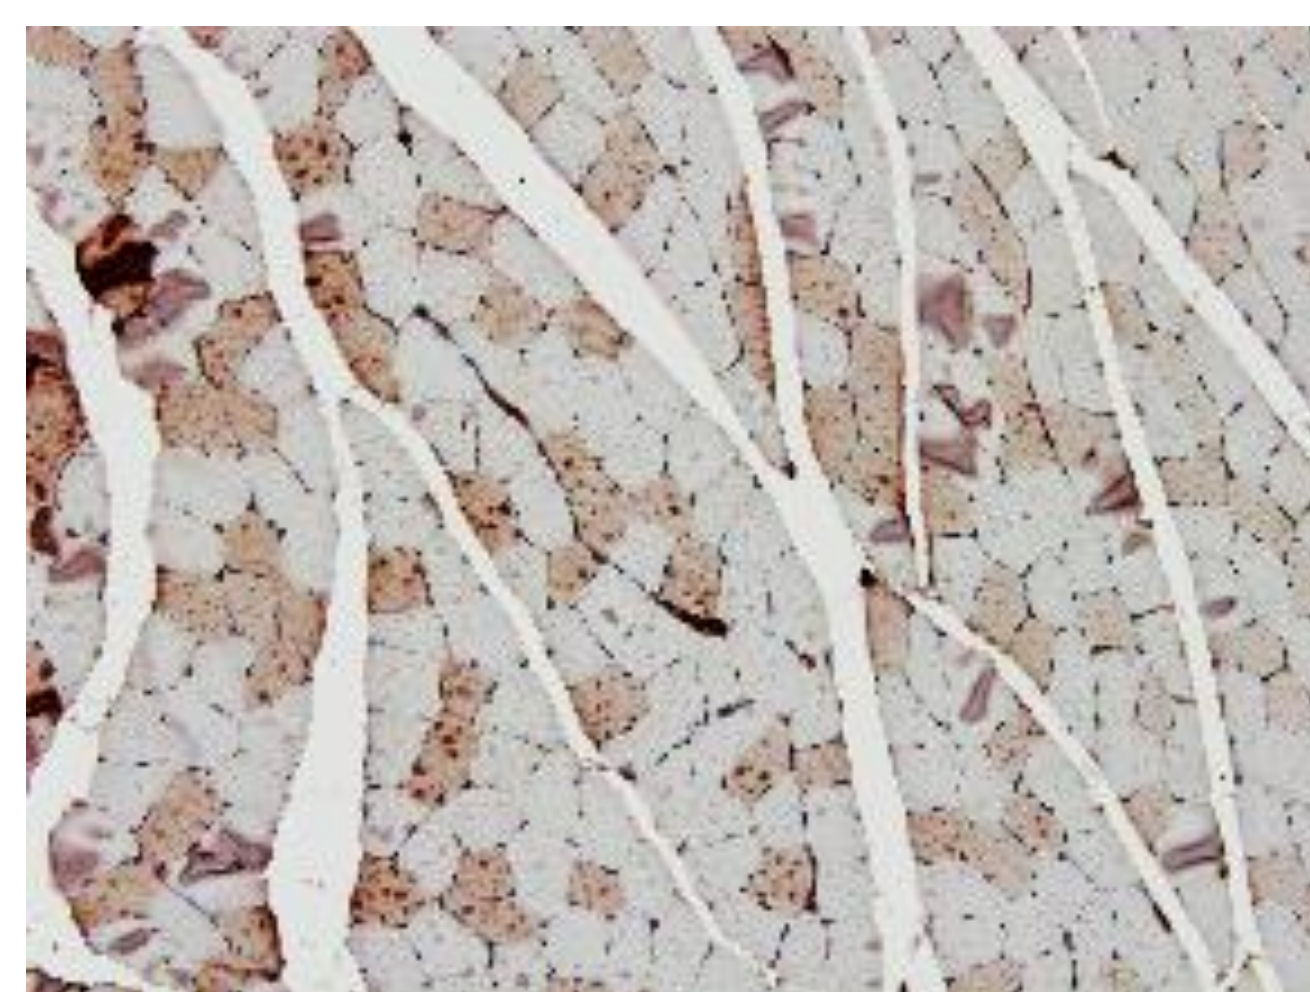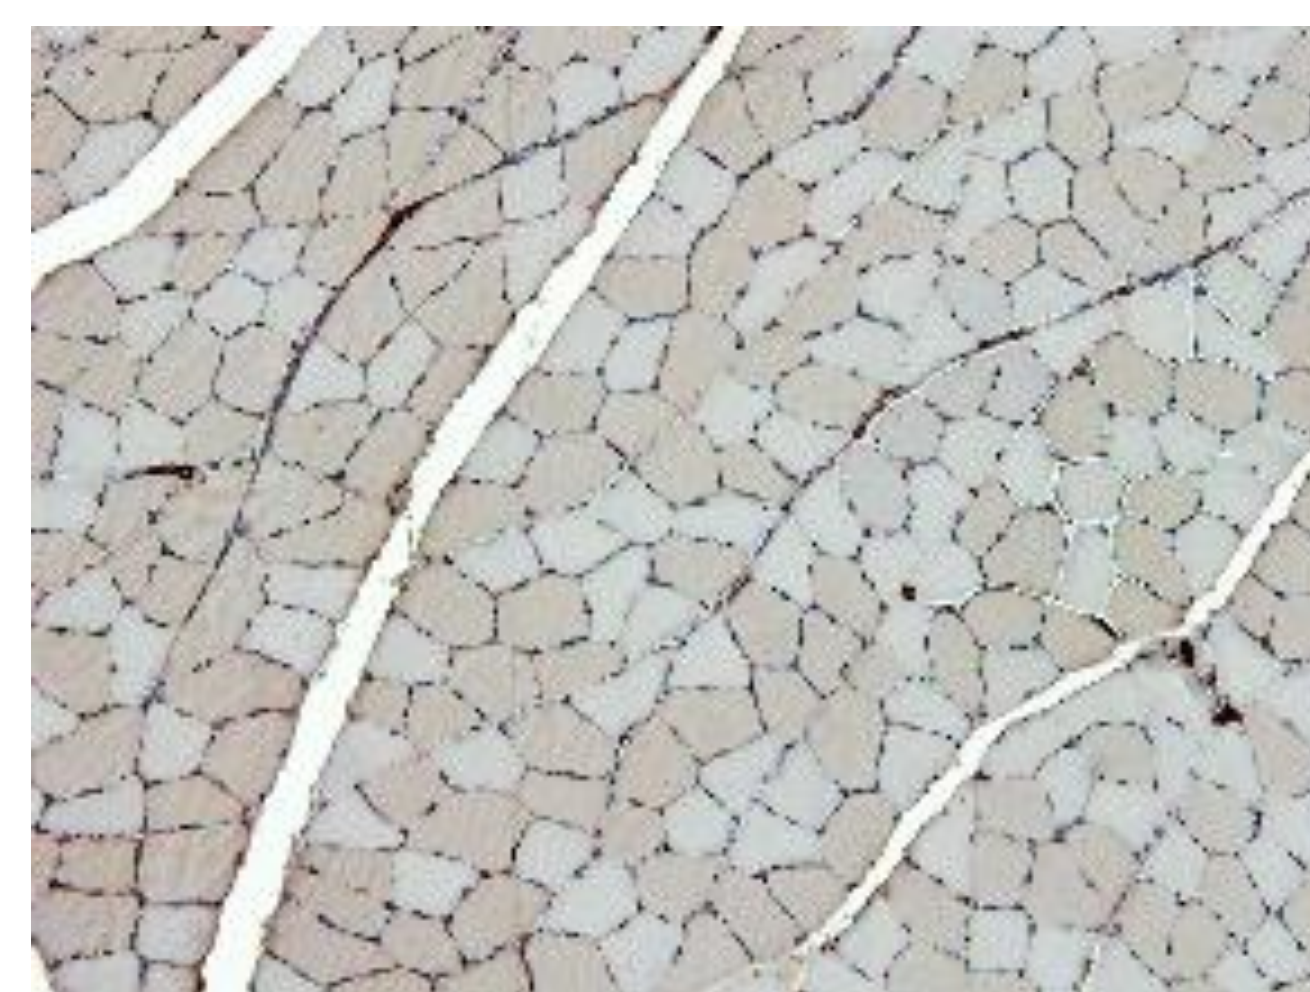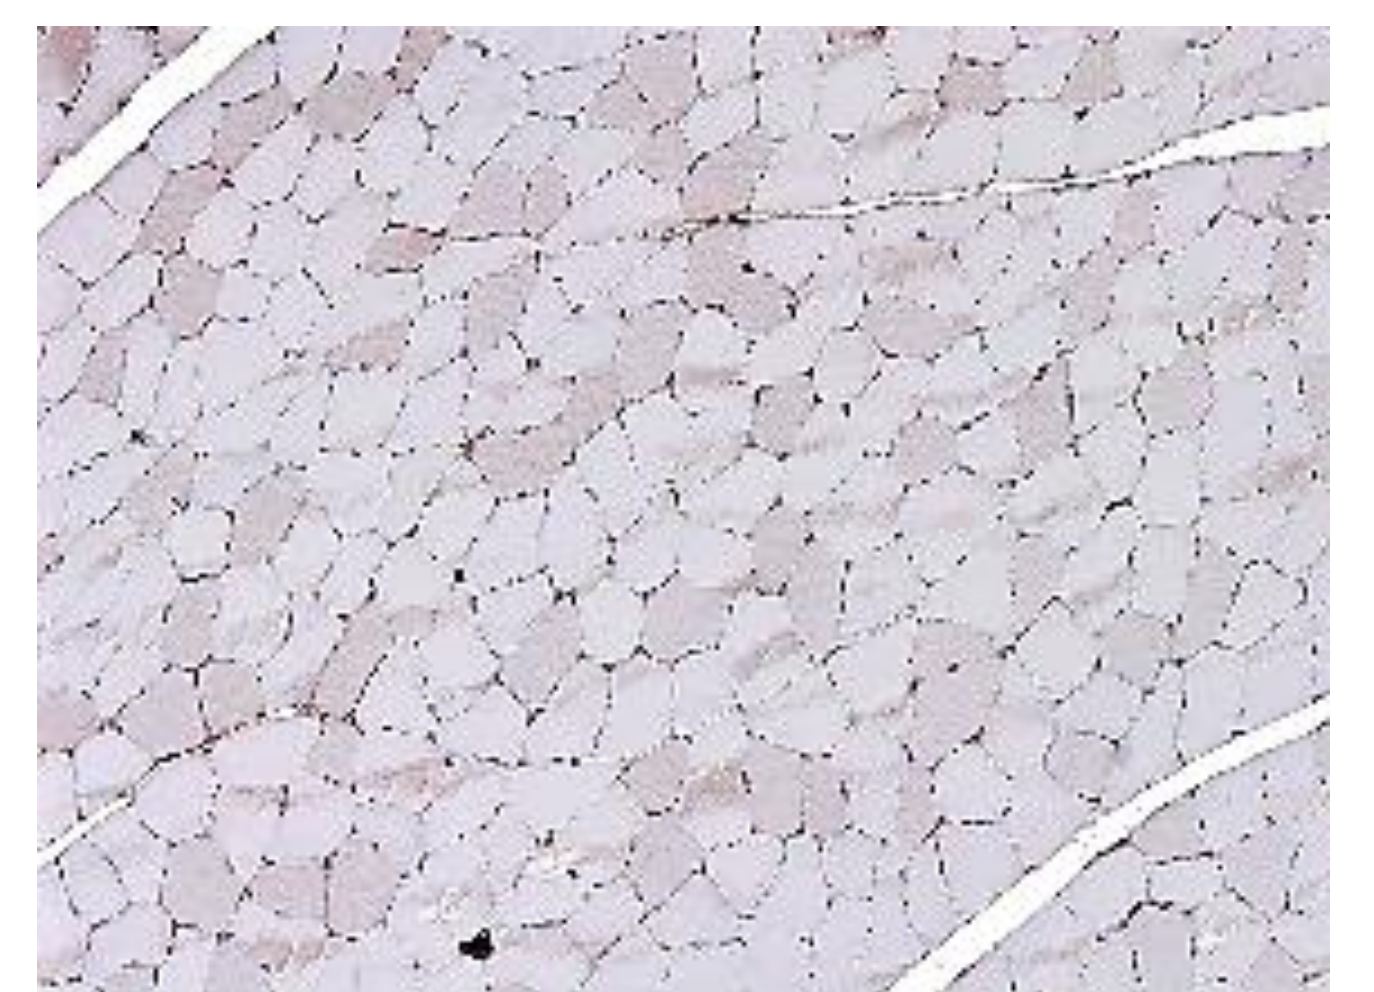

**Supplemental Figure 1. Histopathological images**

Representative image of immunohistochemistry against SERCA2 ATPase in the rat medial gastrocnemius (n=7).

**Supplemental Table 2. Effects of B-3 on body and tissue weight in the treated mice at 4 weeks.**

|                                           |                | <b>Control</b>      | <b>B-3HK</b>        |           |
|-------------------------------------------|----------------|---------------------|---------------------|-----------|
| <b>Body weight (g)</b>                    | <b>initial</b> | <b>24.02 ± 0.23</b> | <b>24.04 ± 0.18</b> |           |
|                                           | <b>1 week</b>  | <b>23.96 ± 0.21</b> | <b>24.21 ± 0.22</b> |           |
|                                           | <b>2 weeks</b> | <b>24.61 ± 0.28</b> | <b>24.48 ± 0.23</b> |           |
|                                           | <b>3 weeks</b> | <b>24.69 ± 0.25</b> | <b>24.49 ± 0.25</b> |           |
|                                           | <b>4 weeks</b> | <b>24.95 ± 0.28</b> | <b>24.56 ± 0.22</b> |           |
| <b>Food intake (g)</b>                    | <b>initial</b> | <b>4.12 ± 0.45</b>  | <b>5.23 ± 0.23</b>  | <b>*</b>  |
|                                           | <b>1 week</b>  | <b>4.82 ± 0.16</b>  | <b>5.09 ± 0.17</b>  |           |
|                                           | <b>2 weeks</b> | <b>3.80 ± 0.11</b>  | <b>3.80 ± 0.13</b>  |           |
|                                           | <b>3 weeks</b> | <b>4.06 ± 0.18</b>  | <b>4.34 ± 0.17</b>  |           |
|                                           | <b>4 weeks</b> | <b>3.60 ± 0.14</b>  | <b>3.44 ± 0.13</b>  |           |
| <b>Liver weight (g)</b>                   |                | <b>1.20 ± 0.02</b>  | <b>1.16 ± 0.03</b>  |           |
| <b>Liver weight / body weight (mg/g)</b>  |                | <b>47.93 ± 0.69</b> | <b>47.68 ± 1.20</b> |           |
| <b>Soleus weight (mg)</b>                 |                | <b>10.21 ± 0.49</b> | <b>11.98 ± 1.19</b> |           |
| <b>Soleus weight / body weight (mg/g)</b> |                | <b>0.41 ± 0.02</b>  | <b>0.49 ± 0.05</b>  | <b>**</b> |

The data are presented as the mean and S.E.

Asterisks (\*) denote significant differences from the control group at \*:p<0.05 or \*\*:p<0.01 (*t*-test).

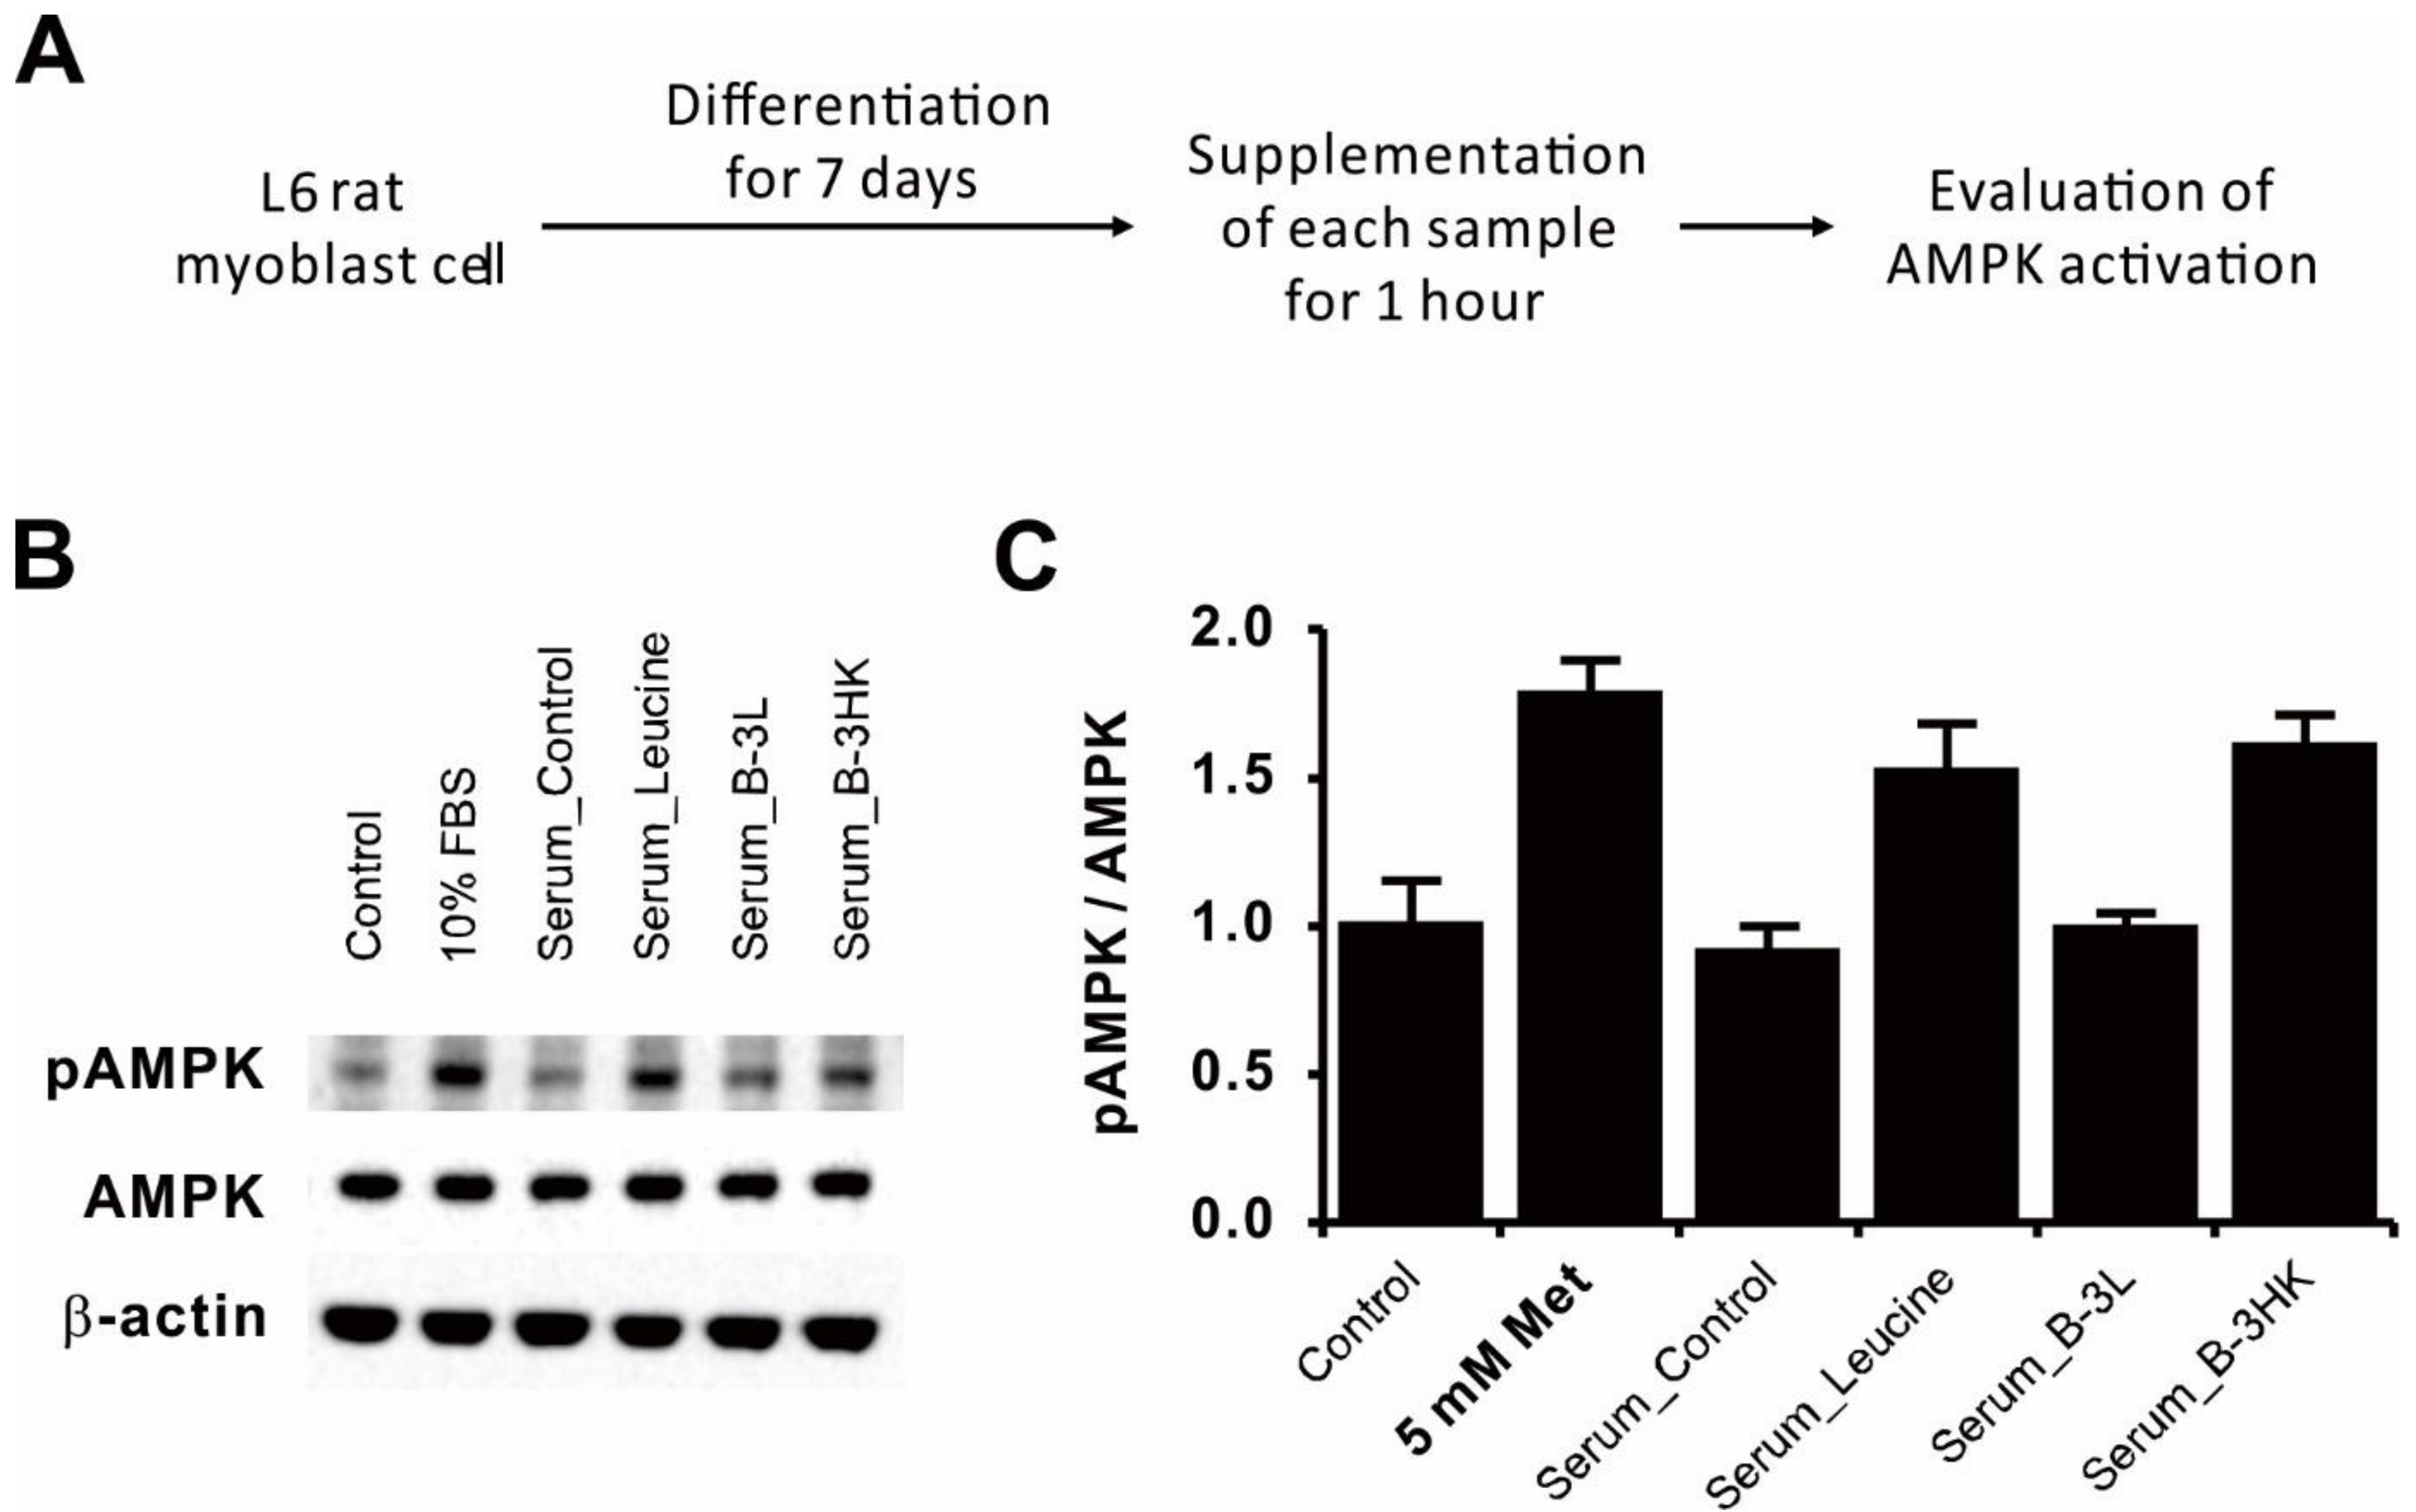

**Supplemental Figure 2. Effects of the rat serum on AMPK activation *in vitro***

(A) Differentiated L6 cells were cultured with samples such as 5 mM metformin (Met, positive control) and 1% (v/v) rat serum for 1h, and then AMPK activation was determined using western blotting. (B) Representative bands and (C) the expression ratio of pAMPK to AMPK are indicated (n=3). The data are expressed as the mean and S.E.
